# Supplementary material for: Human hair shaft proteomic profiling: individual differences, site specificity and cuticle analysis
Source: PeerJ. 2014 Aug 5;2:e506. doi: 10.7717/peerj.506 (PMC4137660; doi:10.7717/peerj.506)
Supplement: Table S1 [file peerj-02-506-s001.xlsx]

## Sheet: Sheet1
Supplemental Table S1. Profiles of protein constituents in samples of hair and isolated cuticle			Cuticle									Total Hair
			Caucasian1	Caucasian2	Caucasian3	Caucasian4	Caucasian5	Asian1	Asian2			Caucasian1				Caucasian2				Caucasian3				Caucasian4				Caucasian5				Caucasian6					Korean1				Korean2				Korean3				Korean4
Identified Proteins	Accession Number	MW	3b	5B	1B	2B	C4	C7	K14			B1	L1L1	R1		VOL5B	VOL5L	VOL5R		B2	L2	R2		B3	L3	R3		VOL4-B	VOL4-I	VOL4R		VOL171	VOL172	VOL173			K1-1	K1-2	K1-3		K2-1	K2-2	K2-3		K3-1	K3-2	K3-3		4B
sp|O43790|KRT86_HUMAN Keratin, type II cuticular Hb6 OS=Homo sapiens GN=KRT86 PE=1...	sp|O43790|KRT86_HUMAN	53 kDa	23.082	60.278	46.897	61.486	73.51	72.145	88.346			246.24	250.79	228.34		378.62	313.52	319.28		273.33	286.96	292.88		281.55	254.54	256.62		220.23	187.34	249.11		338.47	374.16	344.26			314.96	288.68	259.24		283.88	304.25	298.2		291.61	261.51	253.61		292.6
sp|Q14525|KT33B_HUMAN Keratin, type I cuticular Ha3-II OS=Homo sapiens GN=KRT33B...	sp|Q14525|KT33B_HUMAN	46 kDa	9.7185	89.211	26.575	27.948	47.645	49.947	59.498			260.96	254.97	221.78		315.35	300.91	271.09		262.4	272.25	289.19		259.89	220.04	242.11		251.23	258.79	232.72		277.42	300.7	279.85			342.95	267.82	277.29		318.58	313.96	321.03		307.04	291.44	333.77		301.26
sp|P78386|KRT85_HUMAN Keratin, type II cuticular Hb5 OS=Homo sapiens GN=KRT85 PE=1...	sp|P78386|KRT85_HUMAN	56 kDa	17.007	62.689	37.518	48.909	50.368	49.947	75.725			100.37	97.53	89.238		90.948	79.281	73.15		80.178	88.296	86.141		75.231	88.017	73.638		92.988	79.383	81.944		59.954	67.859	66.63			111.98	102.6	93.524		93.049	97.103	89.765		97.203	91.371	84.537		72.186
sp|Q15323|K1H1_HUMAN Keratin, type I cuticular Ha1 OS=Homo sapiens GN=KRT31 PE=2...	sp|Q15323|K1H1_HUMAN	47 kDa	4.8593	14.467	7.8162	5.5896	25.865	31.448	41.469			82.971	80.811	72.177		100.83	95.497	80.035		88.682	100.56	89.832		87.77	72.555	79.217		52.204	61.919	40.972		58.864	75.33	62.188			52.493	39.998	37.738		45.736	40.459	39.558		44.744	51.987	49.556		67.374
tr|I3L2N9|I3L2N9_HUMAN Uncharacterized protein OS=Homo sapiens PE=3 SV=1	tr|I3L2N9|I3L2N9_HUMAN	45 kDa	0	9.6444	0	0	6.8065	3.6997	9.0149			58.883	68.271	55.117		74.143	88.29	61.962		58.311	60.091	60.298		51.294	39.251	47.976		106.04	73.033	65.555		43.603	59.766	52.194			75.24	55.65	57.427		69.393	72.827	71.508		66.345	85.07	69.962		68.336
tr|B5MDD6|B5MDD6_HUMAN Keratin-associated protein 9-9 OS=Homo sapiens GN=KRTAP9-9...	tr|B5MDD6|B5MDD6_HUMAN	18 kDa	0	0	0	0	0	0	0			64.236	72.451	60.367		0	44.145	68.847		69.245	69.901	81.218		107.15	108.24	89.258		79.937	92.085	83.583		43.603	33.618	39.978			69.99	48.694	57.427		67.816	35.604	45.643		44.744	40.959	55.386		0
sp|Q14533|KRT81_HUMAN Keratin, type II cuticular Hb1 OS=Homo sapiens GN=KRT81 PE=1...	sp|Q14533|KRT81_HUMAN	55 kDa	0	0	0	0	0	0	9.0149			24.088	30.652	27.559		42.508	37.839	37.866		26.726	20.848	17.228		20.518	28.546	29.009		48.941	47.63	37.694		61.589	62.879	62.188			36.745	31.303	50.864		34.696	43.696	51.729		33.944	25.206	40.811		28.875
sp|Q9NSB4|KRT82_HUMAN Keratin, type II cuticular Hb2 OS=Homo sapiens GN=KRT82 PE=1...	sp|Q9NSB4|KRT82_HUMAN	57 kDa	117.84	178.42	134.44	134.15	141.57	105.44	117.19			56.206	45.979	40.682		19.771	22.523	23.236		40.089	40.469	43.07		36.476	46.388	37.935		34.259	38.104	40.972		25.617	19.922	21.1			33.245	33.042	36.097		25.234	25.894	30.429		23.143	26.781	33.523		36.574
sp|P78385|KRT83_HUMAN Keratin, type II cuticular Hb3 OS=Homo sapiens GN=KRT83 PE=1...	sp|P78385|KRT83_HUMAN	54 kDa	3.6445	14.467	0	0	6.8065	0	3.606			14.721	18.113	15.748		39.543	42.343	30.981		48.593	33.111	30.765		25.077	21.41	24.546		26.102	20.64	21.305		58.864	47.937	49.973			31.496	33.042	22.971		29.965	30.749	27.386		38.572	44.11	33.523		31.762
sp|O76009|KT33A_HUMAN Keratin, type I cuticular Ha3-I OS=Homo sapiens GN=KRT33A PE=2...	sp|O76009|KT33A_HUMAN	46 kDa	0	7.2333	0	0	4.0839	7.3995	7.2119			28.103	32.046	36.745		53.383	45.947	56.799		36.445	34.337	29.534		26.217	28.546	41.282		47.31	44.455	45.889		25.072	26.148	32.205			50.743	48.694	37.738		45.736	40.459	47.165		54.001	48.836	45.184		33.687
sp|Q9BYQ3|KRA93_HUMAN Keratin-associated protein 9-3 OS=Homo sapiens GN=KRTAP9-3...	sp|Q9BYQ3|KRA93_HUMAN	17 kDa	0	0	0	0	0	0	0			34.794	33.439	34.12		0	26.127	21.515		31.585	28.206	38.148		31.916	34.493	33.472		48.941	52.393	55.722		29.432	23.035	23.321			0	55.65	47.582		55.199	63.117	47.165		40.115	28.357	40.811		0
sp|Q92764|KRT35_HUMAN Keratin, type I cuticular Ha5 OS=Homo sapiens GN=KRT35 PE=2...	sp|Q92764|KRT35_HUMAN	50 kDa	29.156	48.222	23.449	29.345	62.62	24.048	50.483			16.059	16.72	22.309		23.726	25.226	26.678		23.082	20.848	18.459		14.818	20.22	17.852		6.5255	6.3507	8.1944		20.711	25.525	20.544			17.498	15.652	18.049		12.617	12.947	15.214		26.229	20.48	18.948		18.287
sp|P15924|DESP_HUMAN Desmoplakin OS=Homo sapiens GN=DSP PE=1 SV=3	sp|P15924|DESP_HUMAN	332 kDa	37.659	26.522	31.265	27.948	6.8065	0	0			33.456	26.473	22.309		26.691	14.415	24.957		26.726	15.942	18.459		25.077	33.304	20.083		22.839	25.403	26.222		22.892	10.584	20.544			24.497	26.086	22.971		17.348	16.184	22.822		13.886	25.206	14.575		25.025
sp|O76015|KRT38_HUMAN Keratin, type I cuticular Ha8 OS=Homo sapiens GN=KRT38 PE=2...	sp|O76015|KRT38_HUMAN	50 kDa	0	0	4.6897	5.5896	0	0	0			8.0295	2.7866	17.06		9.8857	9.0092	11.188		14.578	12.263	9.8446		15.958	14.273	20.083		0	0	0		9.8107	15.564	7.2183			0	0	0		14.194	6.4735	0		0	0	2.9151		29.837
sp|Q14532|K1H2_HUMAN Keratin, type I cuticular Ha2 OS=Homo sapiens GN=KRT32 PE=1...	sp|Q14532|K1H2_HUMAN	50 kDa	59.526	120.56	93.795	79.652	77.594	62.896	75.725			28.103	16.72	30.183		13.84	11.712	12.048		21.867	17.169	20.92		22.797	29.736	24.546		13.051	12.701	14.75		15.806	17.432	15.547			8.7488	10.434	11.485		9.4627	8.0919	9.1287		7.7145	7.8768	10.203		26.95
sp|P0C7H8|KRA23_HUMAN Keratin-associated protein 2-3 OS=Homo sapiens GN=KRTAP2-3...	sp|P0C7H8|KRA23_HUMAN (+1)	13 kDa	0	0	0	0	0	9.2494	14.424			44.162	27.866	31.496		20.76	17.117	23.236		26.726	44.148	40.609		53.574	48.766	56.902		0	26.99	0		6.5405	6.2256	0			0	29.564	26.252		0	0	38.036		0	36.233	32.066		16.362
sp|Q9BYR8|KRA31_HUMAN Keratin-associated protein 3-1 OS=Homo sapiens GN=KRTAP3-1...	sp|Q9BYR8|KRA31_HUMAN	11 kDa	0	0	0	0	6.8065	0	5.4089			17.397	11.146	15.748		25.703	27.028	20.654		19.437	18.395	15.998		23.937	13.084	15.62		14.682	12.701	19.667		16.896	18.677	17.768			26.246	19.13	16.408		18.925	19.421	16.736		21.601	15.754	18.948		17.325
sp|Q6A163|K1C39_HUMAN Keratin, type I cytoskeletal 39 OS=Homo sapiens GN=KRT39 PE=1...	sp|Q6A163|K1C39_HUMAN	56 kDa	15.793	14.467	17.196	11.179	17.697	12.949	10.818			21.412	22.293	23.622		21.749	17.117	19.794		17.007	13.49	14.767		15.958	24.978	14.504		17.945	11.114	14.75		11.446	11.206	12.216			17.498	17.391	21.33		11.04	21.039	12.172		13.886	14.178	13.118		23.1
tr|I3L160|I3L160_HUMAN Keratin-associated protein 9-2 OS=Homo sapiens GN=KRTAP9-2...	tr|I3L160|I3L160_HUMAN	18 kDa	0	0	0	0	0	0	0			12.044	15.326	35.433		0	9.0092	24.957		19.437	15.942	13.536		14.818	15.463	15.62		14.682	28.578	47.528		10.901	13.074	13.326			12.248	15.652	14.767		9.4627	12.947	12.172		6.1716	11.028	13.118		0
sp|P0C0S8|H2A1_HUMAN Histone H2A type 1 OS=Homo sapiens GN=HIST1H2AG PE=1 SV=2	sp|P0C0S8|H2A1_HUMAN (+4)	14 kDa	7.2889	12.056	0	12.577	8.1678	3.6997	7.2119			16.059	13.933	23.622		12.851	4.5046	8.6059		18.222	0	13.536		11.399	14.273	13.389		21.208	22.227	21.305		6.5405	4.3579	8.3288			27.996	31.303	29.534		22.08	21.039	19.779		26.229	22.055	16.033		13.475
sp|Q9BYR7|KRA32_HUMAN Keratin-associated protein 3-2 OS=Homo sapiens GN=KRTAP3-2...	sp|Q9BYR7|KRA32_HUMAN	10 kDa	0	0	0	0	0	0	0			12.044	12.54	15.748		17.794	14.415	18.933		10.933	26.979	18.459		18.238	17.841	10.042		14.682	14.289	21.305		11.446	16.187	10.55			10.499	10.434	0		12.617	12.947	7.6072		16.972	12.603	16.033		9.6248
sp|Q9BYQ0|KRA98_HUMAN Keratin-associated protein 9-8 OS=Homo sapiens GN=KRTAP9-8...	sp|Q9BYQ0|KRA98_HUMAN	17 kDa	0	0	0	0	0	0	0			2.6765	8.3598	14.435		0	9.9101	14.63		7.2889	12.263	11.075		14.818	14.273	15.62		37.521	23.815	32.778		10.901	14.941	12.216			22.747	26.086	42.66		23.657	30.749	28.907		13.886	36.233	29.151		0
sp|Q5VU13|VSIG8_HUMAN V-set and immunoglobulin domain-containing protein 8 OS=Homo...	sp|Q5VU13|VSIG8_HUMAN	44 kDa	38.874	38.578	39.081	48.909	42.2	22.198	34.257			9.3677	6.9665	10.499		3.9543	5.4055	12.909		6.0741	7.358	3.6917		7.9791	8.326	11.157		0	9.526	0		13.081	7.4707	11.66			0	0	3.2815		3.1542	0	0		4.6287	3.1507	5.8301		20.212
sp|O60814|H2B1K_HUMAN Histone H2B type 1-K OS=Homo sapiens GN=HIST1H2BK PE=1 SV=3	sp|O60814|H2B1K_HUMAN (+7)	14 kDa	0	0	7.8162	25.153	6.8065	0	0			18.735	18.113	19.685		9.8857	9.0092	7.7453		14.578	12.263	13.536		10.259	13.084	13.389		17.945	19.052	19.667		13.081	6.8482	12.216			0	0	0		0	17.802	0		15.429	15.754	16.033		13.475
sp|Q9BYR4|KRA43_HUMAN Keratin-associated protein 4-3 OS=Homo sapiens GN=KRTAP4-3...	sp|Q9BYR4|KRA43_HUMAN	21 kDa	0	0	0	0	0	0	0			9.3677	27.866	10.499		5.9314	6.3064	8.6059		10.933	13.49	11.075		9.1189	19.031	12.273		13.051	12.701	14.75		13.081	4.3579	13.881			10.499	17.391	9.8446		7.8855	6.4735	12.172		6.1716	9.4522	8.7452		10.587
sp|P33764|S10A3_HUMAN Protein S100-A3 OS=Homo sapiens GN=S100A3 PE=1 SV=1	sp|P33764|S10A3_HUMAN	12 kDa	7.2889	21.7	17.196	6.987	38.116	59.196	50.483			13.382	18.113	19.685		6.92	6.3064	6.0241		12.148	11.037	15.998		10.259	13.084	13.389		14.682	19.052	16.389		9.2657	6.2256	9.4393			0	10.434	14.767		12.617	14.565	9.1287		9.2574	11.028	11.66		13.475
sp|Q9BYQ2|KRA94_HUMAN Keratin-associated protein 9-4 OS=Homo sapiens GN=KRTAP9-4...	sp|Q9BYQ2|KRA94_HUMAN	16 kDa	0	0	0	0	0	0	0			13.382	12.54	14.435		0	7.2074	13.769		15.793	13.49	22.15		15.958	22.599	15.62		22.839	17.464	11.472		11.991	9.961	11.66			0	13.912	14.767		25.234	24.276	22.822		18.515	15.754	16.033		0
sp|P14923|PLAK_HUMAN Junction plakoglobin OS=Homo sapiens GN=JUP PE=1 SV=3	sp|P14923|PLAK_HUMAN	82 kDa	12.148	14.467	12.506	5.5896	0	0	0			12.044	5.5732	14.435		5.9314	6.3064	5.1635		0	6.1317	6.1529		11.399	10.705	11.157		14.682	15.877	21.305		11.446	8.0933	6.663			10.499	17.391	14.767		15.771	17.802	9.1287		10.8	15.754	10.203		7.6999
sp|Q13228|SBP1_HUMAN Selenium-binding protein 1 OS=Homo sapiens GN=SELENBP1 PE=1...	sp|Q13228|SBP1_HUMAN	52 kDa	0	0	0	0	0	0	0			8.0295	12.54	10.499		17.794	8.1083	18.072		13.363	9.8107	7.3835		6.8392	4.7577	10.042		9.7882	0	11.472		8.7206	6.8482	12.216			20.997	20.869	14.767		15.771	24.276	18.257		16.972	18.904	14.575		14.437
sp|P31947|1433S_HUMAN 14-3-3 protein sigma OS=Homo sapiens GN=SFN PE=1 SV=1	sp|P31947|1433S_HUMAN	28 kDa	10.933	4.8222	14.069	8.3844	0	0	5.4089			6.6912	9.753	9.1862		2.9657	6.3064	10.327		7.2889	11.037	3.6917		9.1189	13.084	11.157		8.1568	4.763	8.1944		11.991	6.2256	8.884			5.2493	8.6953	6.5631		6.3084	3.2368	0		12.343	6.3014	2.9151		8.6624
sp|Q86SJ6|DSG4_HUMAN Desmoglein-4 OS=Homo sapiens GN=DSG4 PE=1 SV=1	sp|Q86SJ6|DSG4_HUMAN	114 kDa	3.6445	0	0	0	0	0	0			6.6912	13.933	11.811		10.874	11.712	11.188		4.8593	4.9054	0		9.1189	10.705	7.8101		6.5255	9.526	16.389		5.9954	8.0933	8.3288			8.7488	13.912	8.2039		7.8855	8.0919	7.6072		10.8	11.028	10.203		8.6624
sp|A8MUX0|KR161_HUMAN Keratin-associated protein 16-1 OS=Homo sapiens GN=KRTAP16-1...	sp|A8MUX0|KR161_HUMAN	54 kDa	0	0	3.1265	0	99.374	133.19	93.755			12.044	11.146	14.435		4.9428	7.2074	6.8847		6.0741	6.1317	7.3835		7.9791	10.705	8.9258		0	0	0		8.7206	7.4707	0			0	0	0		0	0	0		0	0	0		7.6999
sp|Q8IUC1|KR111_HUMAN Keratin-associated protein 11-1 OS=Homo sapiens GN=KRTAP11-1...	sp|Q8IUC1|KR111_HUMAN	17 kDa	0	0	0	0	0	0	0			4.0147	8.3598	5.2493		5.9314	3.6037	4.3029		6.0741	6.1317	7.3835		3.4196	5.9471	6.6944		0	0	0		5.9954	6.8482	6.663			0	0	0		0	0	0		0	0	0		9.6248
sp|Q6A162|K1C40_HUMAN Keratin, type I cytoskeletal 40 OS=Homo sapiens GN=KRT40 PE=1...	sp|Q6A162|K1C40_HUMAN	48 kDa	20.652	19.289	15.632	18.166	27.226	40.697	28.848			9.3677	9.753	7.8739		1.9771	2.7028	0		3.6445	0	7.3835		11.399	5.9471	8.9258		9.7882	7.9383	14.75		6.5405	2.4902	6.1078			0	8.6953	9.8446		0	0	0		7.7145	6.3014	7.2877		14.437
sp|A8MTY7|KRA97_HUMAN Keratin-associated protein 9-7 OS=Homo sapiens GN=KRTAP9-7...	sp|A8MTY7|KRA97_HUMAN	18 kDa	0	0	0	0	0	0	0			0	0	0		0	0	0		6.0741	3.679	7.3835		6.8392	9.5154	7.8101		35.89	50.805	34.417		0	0	0			0	3.4781	36.097		0	0	0		0	0	0		0
sp|Q13835|PKP1_HUMAN Plakophilin-1 OS=Homo sapiens GN=PKP1 PE=1 SV=2	sp|Q13835|PKP1_HUMAN	83 kDa	0	0	0	0	0	0	0			8.0295	8.3598	5.2493		2.9657	4.5046	5.1635		4.8593	11.037	7.3835		7.9791	9.5154	4.4629		6.5255	6.3507	3.2778		6.5405	4.9805	3.8868			0	6.9562	4.9223		9.4627	6.4735	9.1287		0	4.7261	7.2877		2.8875
sp|Q52LG2|KR132_HUMAN Keratin-associated protein 13-2 OS=Homo sapiens GN=KRTAP13-2...	sp|Q52LG2|KR132_HUMAN	19 kDa	0	0	0	0	0	0	0			0	0	0		0	0	0		0	0	0		3.4196	3.5683	5.5786		0	3.1753	3.2778		0	1.2451	0			0	5.2172	4.9223		4.7313	6.4735	4.5643		4.6287	4.7261	0		2.8875
sp|O95147|DUS14_HUMAN Dual specificity protein phosphatase 14 OS=Homo sapiens GN=DUSP14...	sp|O95147|DUS14_HUMAN	22 kDa	0	0	0	0	0	0	0			8.0295	6.9665	5.2493		1.9771	3.6037	4.3029		6.0741	7.358	4.9223		3.4196	5.9471	5.5786		6.5255	11.114	9.8333		1.6351	2.4902	2.221			10.499	13.912	13.126		7.8855	8.0919	7.6072		12.343	11.028	8.7452		3.8499
sp|A8MVA2|KRA96_HUMAN Keratin-associated protein 9-6 OS=Homo sapiens GN=KRTAP9-6...	sp|A8MVA2|KRA96_HUMAN	17 kDa	0	0	0	0	0	0	0			2.6765	2.7866	2.6246		0	3.6037	0		9.7185	4.9054	0		5.6993	5.9471	6.6944		0	9.526	0		5.4504	4.9805	6.663			0	0	0		0	0	0		0	0	0		7.6999
sp|P13645|K1C10_HUMAN Keratin, type I cytoskeletal 10 OS=Homo sapiens GN=KRT10 PE=1...	sp|P13645|K1C10_HUMAN	59 kDa	35.23	106.09	123.5	46.114	51.729	68.445	52.286			0	0	0		0	10.811	0		0	0	0		0	0	0		0	0	0		0	0	0			0	0	0		0	0	0		0	0	0		18.287
sp|Q08188|TGM3_HUMAN Protein-glutamine gamma-glutamyltransferase E OS=Homo sapiens...	sp|Q08188|TGM3_HUMAN	77 kDa	40.089	28.933	50.024	41.922	8.1678	9.2494	10.818			5.353	6.9665	7.8739		0	0	3.4424		8.5037	9.8107	8.6141		0	5.9471	5.5786		6.5255	0	8.1944		4.9054	5.603	4.442			3.4995	5.2172	6.5631		0	0	0		4.6287	7.8768	0		1.925
sp|P04264|K2C1_HUMAN Keratin, type II cytoskeletal 1 OS=Homo sapiens GN=KRT1 PE=1...	sp|P04264|K2C1_HUMAN	66 kDa	30.37	106.09	73.472	40.525	46.284	61.046	68.513			0	0	0		0	2.7028	0		0	0	0		0	0	0		0	0	0		0	0	0			0	0	0		0	0	0		0	0	0		4.8124
sp|P62805|H4_HUMAN Histone H4 OS=Homo sapiens GN=HIST1H4A PE=1 SV=2	sp|P62805|H4_HUMAN	11 kDa	0	7.2333	0	2.7948	0	0	0			5.353	5.5732	6.5616		2.9657	2.7028	3.4424		2.4296	3.679	4.9223		3.4196	4.7577	6.6944		0	4.763	3.2778		4.3603	3.7354	5.5525			0	0	0		0	0	0		4.6287	6.3014	5.8301		2.8875
sp|Q8IUC0|KR131_HUMAN Keratin-associated protein 13-1 OS=Homo sapiens GN=KRTAP13-1...	sp|Q8IUC0|KR131_HUMAN	18 kDa	0	0	0	0	0	0	0			0	0	0		0	0	0		0	0	0		0	0	0		0	0	0		2.1802	3.7354	3.3315			0	0	8.2039		9.4627	8.0919	0		9.2574	0	0		4.8124
sp|P04406|G3P_HUMAN Glyceraldehyde-3-phosphate dehydrogenase OS=Homo sapiens GN=GAPDH...	sp|P04406|G3P_HUMAN	36 kDa	20.652	9.6444	26.575	23.756	8.1678	0	5.4089			8.0295	4.1799	0		1.9771	2.7028	1.7212		7.2889	4.9054	4.9223		3.4196	4.7577	4.4629		6.5255	6.3507	0		4.9054	1.2451	3.3315			0	6.9562	0		3.1542	4.8551	4.5643		9.2574	6.3014	4.3726		6.7374
sp|A8MXZ3|KRA91_HUMAN Keratin-associated protein 9-1 OS=Homo sapiens GN=KRTAP9-1...	sp|A8MXZ3|KRA91_HUMAN	26 kDa	0	0	0	0	0	0	0			0	4.1799	0		0	0	0		0	0	0		0	0	0		11.42	6.3507	0		4.3603	1.2451	2.7763			0	0	0		0	0	0		0	0	13.118		0
sp|Q6MZM0|HPHL1_HUMAN Hephaestin-like protein 1 OS=Homo sapiens GN=HEPHL1 PE=2 SV=2	sp|Q6MZM0|HPHL1_HUMAN	132 kDa	0	0	0	0	0	0	0			4.0147	4.1799	0		0	0	0		0	0	0		0	3.5683	0		0	0	3.2778		5.4504	0	4.9973			0	0	0		0	0	0		4.6287	0	0		0
sp|Q8TF66|LRC15_HUMAN Leucine-rich repeat-containing protein 15 OS=Homo sapiens GN=LRRC15...	sp|Q8TF66|LRC15_HUMAN	64 kDa	14.578	9.6444	17.196	27.948	0	0	0			0	0	3.937		0	0	0		0	0	0		0	0	2.2315		0	6.3507	0		3.2702	0	2.221			0	0	0		0	0	0		0	0	0		0
sp|Q9BYP9|KRA99_HUMAN Keratin-associated protein 9-9 OS=Homo sapiens GN=KRTAP9-9...	sp|Q9BYP9|KRA99_HUMAN	16 kDa	0	0	0	0	0	0	0			0	0	0		0	0	0		0	4.9054	2.4612		2.2797	0	4.4629		11.42	0	4.9167		5.9954	0	7.2183			0	0	0		0	0	0		4.6287	17.329	2.9151		11.55
sp|P27482|CALL3_HUMAN Calmodulin-like protein 3 OS=Homo sapiens GN=CALML3 PE=1 SV=2	sp|P27482|CALL3_HUMAN	17 kDa	7.2889	7.2333	3.1265	9.7818	6.8065	5.5496	0			0	4.1799	5.2493		0	4.5046	5.1635		4.8593	0	3.6917		5.6993	3.5683	0		0	0	0		3.2702	4.9805	6.1078			0	0	0		0	0	0		0	0	0		7.6999
sp|Q13885|TBB2A_HUMAN Tubulin beta-2A chain OS=Homo sapiens GN=TUBB2A PE=1 SV=1	sp|Q13885|TBB2A_HUMAN	50 kDa	34.015	16.878	25.012	27.948	10.89	5.5496	7.2119			0	0	0		0	0	1.7212		0	0	0		3.4196	0	0		0	3.1753	0		3.8153	0	3.3315			0	0	3.2815		0	0	4.5643		0	0	0		0
sp|O75367|H2AY_HUMAN Core histone macro-H2A.1 OS=Homo sapiens GN=H2AFY PE=1 SV=4	sp|O75367|H2AY_HUMAN	40 kDa	0	0	0	0	0	0	0			0	5.5732	7.8739		0	3.6037	0		7.2889	3.679	4.9223		5.6993	5.9471	6.6944		6.5255	6.3507	6.5555		0	0	0			10.499	0	0		9.4627	4.8551	7.6072		13.886	6.3014	4.3726		2.8875
sp|Q3LI72|KR195_HUMAN Keratin-associated protein 19-5 OS=Homo sapiens GN=KRTAP19-5...	sp|Q3LI72|KR195_HUMAN	8 kDa	0	0	0	0	0	0	0			0	0	0		0	0	0		0	0	0		0	0	0		0	0	3.2778		0	3.1128	0			0	0	0		7.8855	0	0		0	0	0		0
sp|P60371|KR106_HUMAN Keratin-associated protein 10-6 OS=Homo sapiens GN=KRTAP10-6...	sp|P60371|KR106_HUMAN	37 kDa	0	0	0	0	78.955	90.644	77.528			0	0	0		0	0	0		0	0	0		0	0	0		0	0	0		8.7206	0	7.2183			0	0	0		0	0	0		0	0	0		0
tr|I3L377|I3L377_HUMAN Keratin-associated protein 9-2 OS=Homo sapiens GN=KRTAP9-2...	tr|I3L377|I3L377_HUMAN	17 kDa	0	0	0	0	0	0	0			0	4.1799	5.2493		0	2.7028	0		0	0	0		2.2797	0	4.4629		0	0	0		3.8153	0	4.442			0	6.9562	0		6.3084	0	0		0	0	2.9151		0
sp|Q16777|H2A2C_HUMAN Histone H2A type 2-C OS=Homo sapiens GN=HIST2H2AC PE=1 SV=4	sp|Q16777|H2A2C_HUMAN (+1)	14 kDa	0	0	0	0	0	0	0			4.0147	0	0		0	0	0		0	3.679	0		3.4196	3.5683	0		8.1568	0	4.9167		2.1802	0	0			8.7488	5.2172	4.9223		3.1542	3.2368	0		0	4.7261	4.3726		0
sp|Q8IUC3|KRA71_HUMAN Keratin-associated protein 7-1 OS=Homo sapiens GN=KRTAP7-1...	sp|Q8IUC3|KRA71_HUMAN	9 kDa	0	0	0	0	0	0	0			2.6765	0	2.6246		0	0	0		2.4296	0	2.4612		0	3.5683	6.6944		4.8941	6.3507	0		0	1.2451	2.221			8.7488	8.6953	11.485		12.617	11.329	6.0858		4.6287	0	5.8301		2.8875
sp|O76014|KRT37_HUMAN Keratin, type I cuticular Ha7 OS=Homo sapiens GN=KRT37 PE=2...	sp|O76014|KRT37_HUMAN	50 kDa	0	0	0	4.1922	0	0	0			0	0	0		0	0	0		0	0	0		0	0	0		0	0	0		0	0	1.1105			0	0	0		0	0	0		0	0	0		0
sp|Q9BYR6|KRA33_HUMAN Keratin-associated protein 3-3 OS=Homo sapiens GN=KRTAP3-3...	sp|Q9BYR6|KRA33_HUMAN	10 kDa	0	0	0	0	0	0	0			0	0	0		4.9428	5.4055	6.0241		0	6.1317	0		0	0	0		0	0	0		0	0	0			0	0	0		0	0	0		0	0	0		2.8875
sp|P68363|TBA1B_HUMAN Tubulin alpha-1B chain OS=Homo sapiens GN=TUBA1B PE=1 SV=1	sp|P68363|TBA1B_HUMAN	50 kDa	20.652	14.467	23.449	27.948	10.89	0	0			0	0	0		0	0	0		0	0	0		2.2797	0	2.2315		0	0	0		0	2.4902	2.7763			0	0	0		0	0	0		0	0	0		3.8499
sp|P60413|KR10C_HUMAN Keratin-associated protein 10-12 OS=Homo sapiens GN=KRTAP10-12...	sp|P60413|KR10C_HUMAN	25 kDa	0	0	0	0	32.671	48.097	30.651			2.6765	6.9665	5.2493		0	0	2.5818		0	0	2.4612		4.5595	3.5683	4.4629		0	0	0		4.3603	2.4902	3.3315			0	5.2172	0		0	0	6.0858		4.6287	0	5.8301		0
sp|P35908|K22E_HUMAN Keratin, type II cytoskeletal 2 epidermal OS=Homo sapiens GN=KRT2...	sp|P35908|K22E_HUMAN	65 kDa	7.2889	36.167	29.702	15.371	38.116	48.097	21.636			0	0	0		0	9.9101	0		0	0	0		0	0	0		0	0	0		0	0	0			0	0	0		0	0	0		0	0	0		12.512
sp|P84243|H33_HUMAN Histone H3.3 OS=Homo sapiens GN=H3F3A PE=1 SV=2	sp|P84243|H33_HUMAN	15 kDa	0	0	0	0	0	0	0			0	0	0		1.9771	0	1.7212		0	0	0		0	0	2.2315		8.1568	4.763	9.8333		2.7252	0	0			3.4995	3.4781	3.2815		0	0	4.5643		3.0858	0	2.9151		3.8499
sp|P68431|H31_HUMAN Histone H3.1 OS=Homo sapiens GN=HIST1H3A PE=1 SV=2	sp|P68431|H31_HUMAN	15 kDa	0	0	0	0	0	0	0			4.0147	0	0		0	0	0		0	0	0		2.2797	4.7577	2.2315		0	9.526	4.9167		2.1802	0	3.3315			0	0	0		0	0	0		4.6287	0	2.9151		0
sp|P15090|FABP4_HUMAN Fatty acid-binding protein, adipocyte OS=Homo sapiens GN=FABP4...	sp|P15090|FABP4_HUMAN	15 kDa	0	0	0	0	0	0	0			0	0	0		0	0	0		0	0	0		0	0	0		0	0	0		0	0	0			0	0	0		0	0	0		0	0	0		2.8875
sp|P47929|LEG7_HUMAN Galectin-7 OS=Homo sapiens GN=LGALS7 PE=1 SV=2	sp|P47929|LEG7_HUMAN	15 kDa	4.8593	9.6444	6.253	0	0	0	0			2.6765	0	3.937		3.9543	2.7028	3.4424		2.4296	3.679	0		0	0	3.3472		0	0	0		3.8153	1.8677	2.7763			0	0	0		0	0	0		0	0	0		4.8124
sp|Q9BYQ6|KR411_HUMAN Keratin-associated protein 4-11 OS=Homo sapiens GN=KRTAP4-11 PE=2 SV=2	sp|Q9BYQ6|KR411_HUMAN	21 kDa	0	0	0	0	0	0	0			0	0	0		0	0	0		0	0	0		0	0	0		0	0	0		11.991	0	0			0	0	0		0	0	0		0	0	0		0
sp|P30041|PRDX6_HUMAN Peroxiredoxin-6 OS=Homo sapiens GN=PRDX6 PE=1 SV=3	sp|P30041|PRDX6_HUMAN	25 kDa	0	0	0	0	0	0	0			4.0147	5.5732	3.937		2.9657	1.8018	2.5818		2.4296	3.679	3.6917		0	4.7577	0		0	0	0		1.0901	1.8677	1.6658			0	3.4781	0		4.7313	6.4735	4.5643		0	4.7261	0		4.8124
sp|Q3LI83|KR241_HUMAN Keratin-associated protein 24-1 OS=Homo sapiens GN=KRTAP24-1...	sp|Q3LI83|KR241_HUMAN	28 kDa	10.933	0	15.632	12.577	14.974	0	14.424			0	0	0		0	0	0		0	0	0		0	0	0		0	0	0		0	0	0			0	0	0		0	0	0		0	0	0		3.8499
sp|P35527|K1C9_HUMAN Keratin, type I cytoskeletal 9 OS=Homo sapiens GN=KRT9 PE=1...	sp|P35527|K1C9_HUMAN	62 kDa	8.5037	84.389	32.828	5.5896	21.781	48.097	41.469			0	0	0		1.9771	0	0		0	0	0		0	0	0		0	0	0		0	0	0			0	0	0		0	0	0		0	0	0		0
sp|Q13867|BLMH_HUMAN Bleomycin hydrolase OS=Homo sapiens GN=BLMH PE=1 SV=1	sp|Q13867|BLMH_HUMAN	53 kDa	8.5037	0	12.506	13.974	0	0	0			0	0	3.937		0	1.8018	0		4.8593	0	0		0	0	0		0	0	0		4.3603	0	1.1105			0	0	0		0	0	0		0	0	0		0
sp|P60412|KR10B_HUMAN Keratin-associated protein 10-11 OS=Homo sapiens GN=KRTAP10-11 PE=1 SV=3	sp|P60412|KR10B_HUMAN	30 kDa	0	0	0	0	83.039	101.74	54.089			0	0	0		0	0	0		0	0	0		0	0	0		0	0	0		0	0	0			0	0	0		0	0	0		0	0	0		0
sp|Q5JW98|FA26D_HUMAN Protein FAM26D OS=Homo sapiens GN=FAM26D PE=1 SV=1	sp|Q5JW98|FA26D_HUMAN	35 kDa	0	0	0	0	0	0	0			6.6912	0	5.2493		1.9771	0	0		3.6445	0	0		0	0	0		0	0	0		1.0901	0	1.6658			0	0	0		0	0	0		0	0	0		0
sp|P62937|PPIA_HUMAN Peptidyl-prolyl cis-trans isomerase A OS=Homo sapiens GN=PPIA...	sp|P62937|PPIA_HUMAN (+2)	18 kDa	12.148	0	9.3795	11.179	0	0	0			0	0	0		0	0	0		0	0	0		0	0	0		0	0	0		0	1.2451	0			0	0	0		0	0	0		0	0	0		0
sp|P06703|S10A6_HUMAN Protein S100-A6 OS=Homo sapiens GN=S100A6 PE=1 SV=1	sp|P06703|S10A6_HUMAN	10 kDa	0	0	0	0	0	0	0			0	0	0		0	0	0		0	0	0		0	0	0		0	0	0		0	0	1.6658			0	0	0		0	0	0		0	0	0		0
tr|E9PKE3|E9PKE3_HUMAN Heat shock cognate 71 kDa protein OS=Homo sapiens GN=HSPA8...	tr|E9PKE3|E9PKE3_HUMAN	69 kDa	32.8	16.878	15.632	12.577	0	0	3.606			0	0	0		2.9657	1.8018	0		0	0	0		0	0	0		0	0	0		0	0	1.6658			0	0	0		0	0	0		0	0	0		1.925
tr|C4AMA3|C4AMA3_HUMAN Keratin, type I cuticular Ha4 OS=Homo sapiens GN=KRT34 PE=3...	tr|C4AMA3|C4AMA3_HUMAN	45 kDa	0	0	0	0	0	0	0			0	0	0		0	0	0		4.8593	3.679	0		0	0	0		0	3.1753	0		0	0	0			0	0	0		0	0	0		0	0	0		10.587
sp|P63261|ACTG_HUMAN Actin, cytoplasmic 2 OS=Homo sapiens GN=ACTG1 PE=1 SV=1	sp|P63261|ACTG_HUMAN	42 kDa	13.363	0	10.943	11.179	0	0	0			0	0	2.6246		0	0	0		0	0	0		0	0	0		0	0	0		4.3603	3.7354	3.8868			0	0	0		0	0	0		0	0	0		0
sp|P68104|EF1A1_HUMAN Elongation factor 1-alpha 1 OS=Homo sapiens GN=EEF1A1 PE=1...	sp|P68104|EF1A1_HUMAN (+1)	50 kDa	10.933	4.8222	12.506	4.1922	8.1678	7.3995	9.0149			0	0	0		0	0	0		0	0	0		0	0	0		0	0	0		0	0	0			0	0	0		0	0	0		0	0	0		0
sp|P06576|ATPB_HUMAN ATP synthase subunit beta, mitochondrial OS=Homo sapiens GN=ATP5B...	sp|P06576|ATPB_HUMAN	57 kDa	13.363	14.467	9.3795	5.5896	0	0	0			2.6765	2.7866	6.5616		0	0	0		0	0	0		0	0	0		0	0	0		0	0	1.1105			0	0	0		4.7313	0	0		4.6287	0	2.9151		2.8875
sp|A6NCN2|K121P_HUMAN Keratin-81-like protein KRT121P OS=Homo sapiens GN=KRT121P...	sp|A6NCN2|K121P_HUMAN	29 kDa	0	0	0	0	0	0	0			0	0	0		0	0	0		0	0	0		0	0	0		0	0	0		0	5.603	0			3.4995	0	0		0	0	0		0	0	0		0
sp|P07355|ANXA2_HUMAN Annexin A2 OS=Homo sapiens GN=ANXA2 PE=1 SV=2	sp|P07355|ANXA2_HUMAN	39 kDa	0	0	0	0	0	0	0			0	0	0		0	0	0		0	0	0		0	0	0		0	0	0		2.7252	3.1128	2.7763			0	0	0		0	0	0		0	0	0		0
sp|P28838|AMPL_HUMAN Cytosol aminopeptidase OS=Homo sapiens GN=LAP3 PE=1 SV=3	sp|P28838|AMPL_HUMAN	56 kDa	21.867	0	21.885	8.3844	8.1678	0	0			2.6765	2.7866	0		0	0	0		0	0	0		0	0	0		0	0	0		0	0	1.6658			0	0	0		0	0	0		0	0	0		0
sp|Q9Y4K1|AIM1_HUMAN Absent in melanoma 1 protein OS=Homo sapiens GN=AIM1 PE=1 SV=3	sp|Q9Y4K1|AIM1_HUMAN	189 kDa	4.8593	9.6444	17.196	15.371	6.8065	3.6997	5.4089			0	0	0		0	0	0		0	0	0		0	2.3788	0		0	0	0		0	0	0			0	0	0		0	3.2368	0		0	0	0		0
sp|Q71DI3|H32_HUMAN Histone H3.2 OS=Homo sapiens GN=HIST2H3A PE=1 SV=3	sp|Q71DI3|H32_HUMAN	15 kDa	0	0	0	0	0	0	0			0	0	0		0	0	0		0	0	0		0	0	0		0	0	4.9167		0	0	0			0	0	0		0	0	4.5643		6.1716	6.3014	0		0
sp|Q9Y446|PKP3_HUMAN Plakophilin-3 OS=Homo sapiens GN=PKP3 PE=1 SV=1	sp|Q9Y446|PKP3_HUMAN	87 kDa	0	0	0	0	0	0	0			0	0	0		0	0	0		0	0	0		0	0	0		0	4.763	0		0	0	0			0	0	0		0	4.8551	4.5643		0	0	0		0
sp|P17931|LEG3_HUMAN Galectin-3 OS=Homo sapiens GN=LGALS3 PE=1 SV=5	sp|P17931|LEG3_HUMAN	26 kDa	0	0	0	2.7948	0	0	3.606			0	0	0		0	0	0		0	0	0		0	0	0		0	0	0		0	0	2.221			0	0	0		0	0	0		0	0	0		0
sp|P51178|PLCD1_HUMAN 1-phosphatidylinositol 4,5-bisphosphate phosphodiesterase delta-1...	sp|P51178|PLCD1_HUMAN	86 kDa	10.933	12.056	0	5.5896	0	0	0			0	0	5.2493		0	0	0		0	0	0		0	0	0		0	0	0		1.6351	0	0			0	0	0		0	0	0		0	0	0		0
sp|O76013|KRT36_HUMAN Keratin, type I cuticular Ha6 OS=Homo sapiens GN=KRT36 PE=1...	sp|O76013|KRT36_HUMAN	52 kDa	3.6445	0	0	0	0	0	0			0	0	0		0	0	0		0	0	0		0	0	0		0	0	0		1.0901	0	0			0	0	0		0	0	0		0	0	0		0
sp|P60369|KR103_HUMAN Keratin-associated protein 10-3 OS=Homo sapiens GN=KRTAP10-3 PE=1 SV=2	sp|P60369|KR103_HUMAN	22 kDa	0	0	0	0	43.561	46.247	54.089			0	0	0		0	0	0		0	0	0		0	0	0		0	0	0		2.1802	0	0			0	0	0		0	0	0		0	0	0		0
tr|E7EW10|E7EW10_HUMAN Thioredoxin reductase 1, cytoplasmic OS=Homo sapiens GN=TXNRD1...	tr|E7EW10|E7EW10_HUMAN	67 kDa	8.5037	7.2333	18.759	22.358	0	0	0			0	0	0		0	0	0		0	0	0		0	0	0		0	0	0		0	0	0			0	0	0		0	0	0		0	0	0		0
sp|Q6KB66|K2C80_HUMAN Keratin, type II cytoskeletal 80 OS=Homo sapiens GN=KRT80 PE=1...	sp|Q6KB66|K2C80_HUMAN	51 kDa	6.0741	0	9.3795	6.987	0	0	0			0	0	0		0	0	0		0	0	0		0	0	0		0	0	0		0	0	2.221			0	0	0		0	0	0		0	0	0		0
sp|P12532|KCRU_HUMAN Creatine kinase U-type, mitochondrial OS=Homo sapiens GN=CKMT1A...	sp|P12532|KCRU_HUMAN	47 kDa	3.6445	0	3.1265	5.5896	0	0	0			0	0	0		0	0	0		0	0	0		0	0	0		0	0	0		0	0	0			0	0	4.9223		0	0	0		0	0	0		0
sp|P0CG47|UBB_HUMAN Polyubiquitin-B OS=Homo sapiens GN=UBB PE=1 SV=1	sp|P0CG47|UBB_HUMAN (+18)	26 kDa	2.4296	0	0	0	0	0	0			0	0	0		0	0	0		0	0	0		0	0	0		0	0	0		1.0901	0	0			0	0	0		0	0	0		0	0	0		0
sp|Q9Y3R4|NEUR2_HUMAN Sialidase-2 OS=Homo sapiens GN=NEU2 PE=1 SV=2	sp|Q9Y3R4|NEUR2_HUMAN	42 kDa	2.4296	0	3.1265	5.5896	4.0839	0	0			0	0	0		0	0	0		0	0	0		0	0	0		0	0	3.2778		0	0	0			3.4995	0	0		0	0	0		0	0	0		0
sp|P13639|EF2_HUMAN Elongation factor 2 OS=Homo sapiens GN=EEF2 PE=1 SV=4	sp|P13639|EF2_HUMAN	95 kDa	9.7185	4.8222	4.6897	9.7818	5.4452	0	0			0	0	0		0	0	0		0	0	0		0	0	0		0	0	0		0	0	1.1105			0	0	0		0	0	0		0	0	0		0
sp|P60174|TPIS_HUMAN Triosephosphate isomerase OS=Homo sapiens GN=TPI1 PE=1 SV=3	sp|P60174|TPIS_HUMAN	31 kDa	10.933	0	4.6897	11.179	2.7226	0	0			0	0	0		0	0	0		0	0	0		0	0	0		0	0	0		0	0	0			0	0	0		0	0	0		0	0	0		0
sp|P40926|MDHM_HUMAN Malate dehydrogenase, mitochondrial OS=Homo sapiens GN=MDH2...	sp|P40926|MDHM_HUMAN	36 kDa	23.082	0	10.943	13.974	0	0	0			0	0	0		0	0	0		0	0	0		0	0	0		0	0	0		0	0	2.221			0	0	0		0	0	0		0	0	0		0
sp|P07195|LDHB_HUMAN L-lactate dehydrogenase B chain OS=Homo sapiens GN=LDHB PE=1...	sp|P07195|LDHB_HUMAN	37 kDa	9.7185	0	4.6897	6.987	5.4452	0	5.4089			0	0	0		0	0	0		0	0	0		0	0	0		0	0	0		0	0	0			0	0	0		0	0	0		0	0	0		0
sp|P06733|ENOA_HUMAN Alpha-enolase OS=Homo sapiens GN=ENO1 PE=1 SV=2	sp|P06733|ENOA_HUMAN	47 kDa	9.7185	4.8222	7.8162	5.5896	0	3.6997	0			0	0	0		0	0	0		0	0	0		0	0	0		0	0	0		0	0	0			0	0	0		0	0	0		0	0	2.9151		0
sp|Q6L8H4|KRA51_HUMAN Keratin-associated protein 5-1 OS=Homo sapiens GN=KRTAP5-1 PE=2 SV=1	sp|Q6L8H4|KRA51_HUMAN	24 kDa	0	0	0	0	5.4452	7.3995	5.4089			0	0	0		0	0	0		0	0	0		0	0	0		0	0	0		0	0	0			0	0	0		0	0	0		0	0	0		0
sp|P22735|TGM1_HUMAN Protein-glutamine gamma-glutamyltransferase K OS=Homo sapiens...	sp|P22735|TGM1_HUMAN	90 kDa	14.578	24.111	18.759	19.564	5.4452	7.3995	0			0	0	0		0	0	0		0	0	0		0	0	0		0	0	0		0	0	0			0	0	0		0	0	0		0	0	0		0
sp|P49327|FAS_HUMAN Fatty acid synthase OS=Homo sapiens GN=FASN PE=1 SV=3	sp|P49327|FAS_HUMAN	273 kDa	26.726	0	26.575	25.153	0	0	0			0	0	0		0	0	0		0	0	0		0	0	0		0	0	0		0	0	0			0	0	0		0	0	0		0	0	0		0
sp|P62258|1433E_HUMAN 14-3-3 protein epsilon OS=Homo sapiens GN=YWHAE PE=1 SV=1	sp|P62258|1433E_HUMAN	29 kDa	4.8593	0	0	0	0	0	0			0	0	0		0	0	0		0	0	0		0	0	0		0	0	0		0	0	1.6658			0	0	0		0	0	0		0	0	0		0
sp|P16403|H12_HUMAN Histone H1.2 OS=Homo sapiens GN=HIST1H1C PE=1 SV=2	sp|P16403|H12_HUMAN	21 kDa	0	0	0	0	0	0	0			0	0	0		0	0	0		0	0	0		0	0	0		0	0	0		1.0901	0	1.1105			0	0	0		0	0	0		0	0	0		0
sp|Q9NZD1|GPC5D_HUMAN G-protein coupled receptor family C group 5 member D OS=Homo...	sp|Q9NZD1|GPC5D_HUMAN	?	0	0	0	0	0	0	0			13.382	8.3598	9.1862		0	0	0		0	0	0		0	0	4.4629		0	0	0		0	0	0			0	0	0		0	3.2368	0		0	0	0		0
sp|P00338|LDHA_HUMAN L-lactate dehydrogenase A chain OS=Homo sapiens GN=LDHA PE=1...	sp|P00338|LDHA_HUMAN	37 kDa	3.6445	0	0	0	0	0	0			0	0	0		0	0	0		0	0	0		0	0	0		0	0	0		0	0	0			0	0	0		0	0	0		0	0	0		0
sp|P11940|PABP1_HUMAN Polyadenylate-binding protein 1 OS=Homo sapiens GN=PABPC1 PE=1...	sp|P11940|PABP1_HUMAN (+1)	71 kDa	6.0741	0	0	5.5896	0	0	0			0	0	2.6246		0	0	0		0	0	0		0	0	0		0	0	0		0	0	0			0	0	0		0	0	0		0	0	0		0
sp|Q14956|GPNMB_HUMAN Transmembrane glycoprotein NMB OS=Homo sapiens GN=GPNMB PE=1...	sp|Q14956|GPNMB_HUMAN (+1)	64 kDa	0	0	0	0	0	0	0			0	0	0		0	0	0		0	0	0		0	0	0		0	0	0		0	0	0			0	0	0		0	0	0		4.6287	0	0		0
sp|P05386|RLA1_HUMAN 60S acidic ribosomal protein P1 OS=Homo sapiens GN=RPLP1 PE=1...	sp|P05386|RLA1_HUMAN	12 kDa	12.148	0	0	13.974	0	0	0			0	0	0		0	0	0		0	0	0		0	0	0		0	0	0		0	0	0			0	0	0		0	0	0		0	0	0		0
sp|Q9ULW8|PADI3_HUMAN Protein-arginine deiminase type-3 OS=Homo sapiens GN=PADI3...	sp|Q9ULW8|PADI3_HUMAN	75 kDa	2.4296	12.056	17.196	9.7818	5.4452	11.099	7.2119			0	0	0		0	0	0		0	0	0		0	0	0		0	0	0		0	0	0			0	0	0		0	0	0		0	0	0		0
sp|Q9BYQ4|KRA92_HUMAN Keratin-associated protein 9-2 OS=Homo sapiens GN=KRTAP9-2...	sp|Q9BYQ4|KRA92_HUMAN	18 kDa	0	0	0	0	0	0	0			0	0	0		0	0	0		0	0	0		0	0	0		0	3.1753	0		0	0	0			0	0	0		0	0	0		0	0	0		0
sp|P02511|CRYAB_HUMAN Alpha-crystallin B chain OS=Homo sapiens GN=CRYAB PE=1 SV=2	sp|P02511|CRYAB_HUMAN (+1)	20 kDa	0	0	0	0	0	0	0			0	0	0		0	0	0		0	0	0		0	0	0		0	0	0		0	0	0			0	0	0		0	0	0		0	0	0		1.925
sp|Q86SG7|LYG2_HUMAN Lysozyme g-like protein 2 OS=Homo sapiens GN=LYG2 PE=1 SV=2	sp|Q86SG7|LYG2_HUMAN	23 kDa	4.8593	7.2333	6.253	11.179	0	0	0			0	0	0		0	0	0		0	0	0		0	0	0		0	0	0		0	0	1.6658			0	0	0		0	0	0		0	0	0		0
sp|P13647|K2C5_HUMAN Keratin, type II cytoskeletal 5 OS=Homo sapiens GN=KRT5 PE=1...	sp|P13647|K2C5_HUMAN	62 kDa	4.8593	9.6444	18.759	6.987	0	0	10.818			0	0	0		0	0	0		0	0	0		0	0	0		0	0	0		0	0	0			0	0	0		0	0	0		0	0	0		0
sp|Q6PEX3|KR261_HUMAN Keratin-associated protein 26-1 OS=Homo sapiens GN=KRTAP26-1 PE=1 SV=1	sp|Q6PEX3|KR261_HUMAN	23 kDa	0	0	0	0	20.419	31.448	14.424			0	0	0		0	0	0		0	0	0		0	0	0		0	0	0		0	0	0			0	0	0		0	0	0		0	0	0		0
sp|Q9BYR3|KRA44_HUMAN Keratin-associated protein 4-4 OS=Homo sapiens GN=KRTAP4-4...	sp|Q9BYR3|KRA44_HUMAN	?	0	0	0	0	0	0	0			0	0	0		0	0	0		0	0	0		0	0	0		0	0	0		0	0	0			0	0	0		0	0	0		0	0	0		0
sp|Q701N4|KRA52_HUMAN Keratin-associated protein 5-2 OS=Homo sapiens GN=KRTAP5-2 PE=2 SV=1	sp|Q701N4|KRA52_HUMAN	16 kDa	0	0	0	0	14.974	18.499	7.2119			0	0	0		0	0	0		0	0	0		0	0	0		0	0	0		0	0	0			0	0	0		0	0	0		0	0	0		0
sp|Q07283|TRHY_HUMAN Trichohyalin OS=Homo sapiens GN=TCHH PE=1 SV=2	sp|Q07283|TRHY_HUMAN	254 kDa	0	0	0	0	0	0	0			0	0	0		0	0	0		0	0	0		0	0	0		0	0	0		0	0	0			0	0	0		0	0	0		0	0	0		0
sp|Q00610|CLH1_HUMAN Clathrin heavy chain 1 OS=Homo sapiens GN=CLTC PE=1 SV=5	sp|Q00610|CLH1_HUMAN	192 kDa	19.437	0	0	6.987	0	0	0			0	0	0		0	0	0		0	0	0		0	0	0		0	0	0		0	0	0			0	0	0		0	0	0		0	0	0		3.8499
sp|Q8WWZ1|IL1FA_HUMAN Interleukin-1 family member 10 OS=Homo sapiens GN=IL1F10 PE=1...	sp|Q8WWZ1|IL1FA_HUMAN (+1)	17 kDa	3.6445	7.2333	0	0	0	0	0			0	0	0		0	0	0		0	0	0		0	0	0		0	0	0		0	0	0			0	0	0		0	0	0		0	0	0		0
sp|P08865|RSSA_HUMAN 40S ribosomal protein SA OS=Homo sapiens GN=RPSA PE=1 SV=4	sp|P08865|RSSA_HUMAN (+1)	33 kDa	10.933	4.8222	6.253	6.987	4.0839	0	7.2119			0	0	0		0	0	0		0	0	0		0	0	0		0	0	0		0	0	0			0	0	0		0	0	0		0	0	0		0
sp|P07900|HS90A_HUMAN Heat shock protein HSP 90-alpha OS=Homo sapiens GN=HSP90AA1 PE=1 SV=5	sp|P07900|HS90A_HUMAN	85 kDa	14.578	0	6.253	11.179	0	0	0			0	0	0		0	0	0		0	0	0		0	0	0		0	0	0		0	0	0			0	0	0		0	0	0		0	0	0		0
sp|P11021|GRP78_HUMAN 78 kDa glucose-regulated protein OS=Homo sapiens GN=HSPA5 PE=1...	sp|P11021|GRP78_HUMAN	72 kDa	12.148	12.056	6.253	9.7818	0	0	0			0	0	0		0	0	0		0	0	0		0	0	0		0	0	0		0	0	0			0	0	0		0	0	0		0	0	0		0
sp|P10599|THIO_HUMAN Thioredoxin OS=Homo sapiens GN=TXN PE=1 SV=3	sp|P10599|THIO_HUMAN (+1)	12 kDa	0	0	0	0	0	0	0			0	0	0		0	0	0		0	0	0		0	0	0		3.2627	0	0		0	0	0			0	0	0		0	0	0		0	0	0		0
sp|Q02878|RL6_HUMAN 60S ribosomal protein L6 OS=Homo sapiens GN=RPL6 PE=1 SV=3	sp|Q02878|RL6_HUMAN (+1)	33 kDa	10.933	0	3.1265	5.5896	4.0839	0	0			0	0	0		0	0	0		0	0	0		0	0	0		0	0	0		0	0	0			0	0	0		0	0	0		0	0	0		0
sp|P16401|H15_HUMAN Histone H1.5 OS=Homo sapiens GN=HIST1H1B PE=1 SV=3	sp|P16401|H15_HUMAN	23 kDa	0	0	0	0	0	0	0			0	0	0		0	0	0		0	0	0		0	0	0		0	0	0		0	0	0			0	0	0		0	0	0		0	0	0		0
sp|Q9P0M6|H2AW_HUMAN Core histone macro-H2A.2 OS=Homo sapiens GN=H2AFY2 PE=1 SV=3	sp|Q9P0M6|H2AW_HUMAN (+1)	?	0	0	0	0	0	0	0			0	0	0		0	0	0		0	0	0		0	0	0		0	0	0		0	0	0			0	10.434	9.8446		0	0	0		0	0	0		0
sp|P18669|PGAM1_HUMAN Phosphoglycerate mutase 1 OS=Homo sapiens GN=PGAM1 PE=1 SV=2	sp|P18669|PGAM1_HUMAN	29 kDa	6.0741	0	0	2.7948	0	0	0			0	0	0		0	0	0		0	0	0		0	0	0		0	0	0		0	0	0			0	0	0		0	0	0		0	0	0		0
sp|P36952|SPB5_HUMAN Serpin B5 OS=Homo sapiens GN=SERPINB5 PE=1 SV=2	sp|P36952|SPB5_HUMAN	42 kDa	0	0	0	0	0	0	0			0	0	0		0	0	0		0	0	0		0	0	0		0	0	0		0	0	0			0	0	0		0	0	0		0	0	0		0
sp|P0C0S5|H2AZ_HUMAN Histone H2A.Z OS=Homo sapiens GN=H2AFZ PE=1 SV=2	sp|P0C0S5|H2AZ_HUMAN (+2)	14 kDa	0	0	0	0	0	0	0			0	0	0		0	0	0		0	0	0		0	0	0		0	0	0		0	0	0			0	0	0		0	0	0		0	0	0		0
sp|P50395|GDIB_HUMAN Rab GDP dissociation inhibitor beta OS=Homo sapiens GN=GDI2...	sp|P50395|GDIB_HUMAN (+1)	51 kDa	17.007	0	3.1265	4.1922	0	0	0			0	0	0		0	0	0		0	0	0		0	0	0		0	0	0		0	0	0			0	0	0		0	0	0		0	0	0		0
sp|P60014|KR10A_HUMAN Keratin-associated protein 10-10 OS=Homo sapiens GN=KRTAP10-10...	sp|P60014|KR10A_HUMAN	26 kDa	0	0	0	0	9.5291	11.099	3.606			0	0	0		0	0	0		0	0	0		0	0	0		0	0	0		0	0	0			0	0	0		0	0	0		0	0	0		0
sp|P55072|TERA_HUMAN Transitional endoplasmic reticulum ATPase OS=Homo sapiens GN=VCP PE=1 SV=4	sp|P55072|TERA_HUMAN	89 kDa	9.7185	0	4.6897	11.179	0	0	0			0	0	0		0	0	0		0	0	0		0	0	0		0	0	0		0	0	0			0	0	0		0	0	0		0	0	0		0
sp|P60370|KR105_HUMAN Keratin-associated protein 10-5 OS=Homo sapiens GN=KRTAP10-5 PE=2 SV=2	sp|P60370|KR105_HUMAN	28 kDa	0	0	0	0	10.89	22.198	14.424			0	0	0		0	0	0		0	0	0		0	0	0		0	0	0		0	0	0			0	0	0		0	0	0		0	0	0		0
sp|P25705|ATPA_HUMAN ATP synthase subunit alpha, mitochondrial OS=Homo sapiens GN=ATP5A1...	sp|P25705|ATPA_HUMAN (+1)	60 kDa	0	4.8222	0	2.7948	0	0	0			0	0	2.6246		0	0	0		0	0	0		0	0	0		0	0	0		0	0	0			0	0	0		0	0	0		0	0	0		0
sp|P23396|RS3_HUMAN 40S ribosomal protein S3 OS=Homo sapiens GN=RPS3 PE=1 SV=2	sp|P23396|RS3_HUMAN	27 kDa	6.0741	0	0	9.7818	4.0839	0	0			0	0	0		0	0	0		0	0	0		0	0	0		0	0	0		0	0	0			0	0	0		0	0	0		0	0	0		0
sp|P14618|KPYM_HUMAN Pyruvate kinase isozymes M1/M2 OS=Homo sapiens GN=PKM PE=1 SV=4	sp|P14618|KPYM_HUMAN	58 kDa	7.2889	0	7.8162	9.7818	0	0	0			0	0	0		0	0	0		0	0	0		0	0	0		0	0	0		0	0	0			0	0	0		0	0	0		0	0	0		0
sp|Q9NZT1|CALL5_HUMAN Calmodulin-like protein 5 OS=Homo sapiens GN=CALML5 PE=1 SV=2	sp|Q9NZT1|CALL5_HUMAN	16 kDa	13.363	0	0	8.3844	0	0	0			0	0	0		0	0	0		0	0	0		0	0	0		0	0	0		0	0	0			0	0	0		0	0	0		0	0	0		0
sp|P02533|K1C14_HUMAN Keratin, type I cytoskeletal 14 OS=Homo sapiens GN=KRT14 PE=1...	sp|P02533|K1C14_HUMAN	52 kDa	4.8593	9.6444	7.8162	5.5896	0	0	3.606			0	0	0		0	0	0		0	0	0		0	0	0		0	0	0		0	0	0			0	0	0		0	0	0		0	0	0		0
sp|Q562R1|ACTBL_HUMAN Beta-actin-like protein 2 OS=Homo sapiens GN=ACTBL2 PE=1 SV=2	sp|Q562R1|ACTBL_HUMAN	42 kDa	4.8593	7.2333	6.253	12.577	0	0	0			0	0	0		0	0	0		0	0	0		0	0	0		0	0	0		0	0	0			0	0	0		0	0	0		0	0	0		0
sp|P05387|RLA2_HUMAN 60S acidic ribosomal protein P2 OS=Homo sapiens GN=RPLP2 PE=1...	sp|P05387|RLA2_HUMAN	12 kDa	10.933	0	7.8162	13.974	0	0	0			0	0	0		0	0	0		0	0	0		0	0	0		0	0	0		0	0	0			0	0	0		0	0	0		0	0	0		0
sp|O75190|DNJB6_HUMAN DnaJ homolog subfamily B member 6 OS=Homo sapiens GN=DNAJB6...	sp|O75190|DNJB6_HUMAN (+3)	36 kDa	0	0	0	0	0	0	0			0	0	0		0	1.8018	0		0	0	0		0	0	0		0	0	0		0	0	0			0	0	0		0	0	0		0	0	0		1.925
sp|Q14134|TRI29_HUMAN Tripartite motif-containing protein 29 OS=Homo sapiens GN=TRIM29...	sp|Q14134|TRI29_HUMAN	66 kDa	0	0	0	0	0	0	0			0	0	0		0	1.8018	1.7212		0	0	0		0	0	0		0	0	0		1.6351	1.8677	0			0	0	0		0	0	0		0	0	0		0
sp|P32119|PRDX2_HUMAN Peroxiredoxin-2 OS=Homo sapiens GN=PRDX2 PE=1 SV=5	sp|P32119|PRDX2_HUMAN	22 kDa	4.8593	0	0	0	0	0	0			0	0	0		0	0	0		0	0	0		0	0	0		0	0	0		0	0	0			0	0	0		0	0	0		0	0	0		0
sp|P60842|IF4A1_HUMAN Eukaryotic initiation factor 4A-I OS=Homo sapiens GN=EIF4A1...	sp|P60842|IF4A1_HUMAN	46 kDa	2.4296	0	3.1265	8.3844	0	0	0			0	0	0		0	0	0		0	0	0		0	0	0		0	0	0		0	0	0			0	0	0		0	0	0		0	0	0		0
sp|P09467|F16P1_HUMAN Fructose-1,6-bisphosphatase 1 OS=Homo sapiens GN=FBP1 PE=1...	sp|P09467|F16P1_HUMAN	37 kDa	3.6445	0	0	6.987	0	0	0			0	0	0		0	0	0		0	0	0		0	0	0		0	0	0		0	0	0			0	0	0		0	0	0		0	0	0		0
sp|P48147|PPCE_HUMAN Prolyl endopeptidase OS=Homo sapiens GN=PREP PE=1 SV=2	sp|P48147|PPCE_HUMAN	81 kDa	12.148	0	6.253	8.3844	0	0	0			0	0	0		0	0	0		0	0	0		0	0	0		0	0	0		0	0	0			0	0	0		0	0	0		0	0	0		0
sp|Q9NTX5|ECHD1_HUMAN Ethylmalonyl-CoA decarboxylase OS=Homo sapiens GN=ECHDC1 PE=1...	sp|Q9NTX5|ECHD1_HUMAN	?	10.933	0	6.253	8.3844	0	0	0			0	0	0		0	0	0		0	0	0		0	0	0		0	0	0		0	0	0			0	0	0		0	0	0		0	0	0		0
sp|P08779|K1C16_HUMAN Keratin, type I cytoskeletal 16 OS=Homo sapiens GN=KRT16 PE=1...	sp|P08779|K1C16_HUMAN	51 kDa	0	0	6.253	4.1922	0	7.3995	9.0149			0	0	0		0	0	0		0	0	0		0	0	0		0	0	0		0	0	0			0	0	0		0	0	0		0	0	0		0
sp|P63104|1433Z_HUMAN 14-3-3 protein zeta/delta OS=Homo sapiens GN=YWHAZ PE=1 SV=1	sp|P63104|1433Z_HUMAN	28 kDa	0	0	0	0	0	0	0			0	0	0		0	0	0		0	0	0		0	0	0		0	0	0		0	0	0			0	0	0		0	0	0		0	0	0		0
sp|P04792|HSPB1_HUMAN Heat shock protein beta-1 OS=Homo sapiens GN=HSPB1 PE=1 SV=2	sp|P04792|HSPB1_HUMAN	23 kDa	2.4296	0	0	0	0	0	0			0	0	0		0	0	0		0	0	0		0	0	0		0	0	0		0	0	0			0	0	0		0	0	0		0	0	0		0
sp|Q96QA5|GSDMA_HUMAN Gasdermin-A OS=Homo sapiens GN=GSDMA PE=2 SV=4	sp|Q96QA5|GSDMA_HUMAN	?	12.148	0	3.1265	4.1922	0	0	0			0	0	0		0	0	0		0	0	0		0	0	0		0	0	0		0	0	0			0	0	0		0	0	0		0	0	0		0
sp|P60410|KR108_HUMAN Keratin-associated protein 10-8 OS=Homo sapiens GN=KRTAP10-8 PE=2 SV=2	sp|P60410|KR108_HUMAN	26 kDa	0	0	0	0	23.142	0	0			0	0	0		0	0	0		0	0	0		0	0	0		0	0	0		0	0	0			0	0	0		0	0	0		0	0	0		0
sp|Q15149|PLEC_HUMAN Plectin OS=Homo sapiens GN=PLEC PE=1 SV=3	sp|Q15149|PLEC_HUMAN	532 kDa	4.8593	0	0	2.7948	0	0	0			0	0	2.6246		0	0	0		0	0	0		0	0	0		0	0	0		0	0	0			0	3.4781	0		0	0	0		0	0	0		0
sp|P02538|K2C6A_HUMAN Keratin, type II cytoskeletal 6A OS=Homo sapiens GN=KRT6A PE=1...	sp|P02538|K2C6A_HUMAN	60 kDa	0	4.8222	6.253	5.5896	0	0	0			0	0	0		0	0	0		0	0	0		0	0	0		0	0	0		0	0	0			0	0	0		0	0	0		0	0	0		0
sp|P05388|RLA0_HUMAN 60S acidic ribosomal protein P0 OS=Homo sapiens GN=RPLP0 PE=1...	sp|P05388|RLA0_HUMAN	34 kDa	10.933	0	7.8162	0	0	0	0			0	0	0		0	0	0		0	0	0		0	0	0		0	0	0		0	0	0			0	0	0		0	0	0		0	0	0		0
sp|P45880|VDAC2_HUMAN Voltage-dependent anion-selective channel protein 2 OS=Homo...	sp|P45880|VDAC2_HUMAN	32 kDa	0	0	0	0	0	0	0			0	0	0		0	0	0		0	0	0		0	0	0		0	0	0		0	0	0			0	0	0		0	0	0		0	0	0		0
sp|P26641|EF1G_HUMAN Elongation factor 1-gamma OS=Homo sapiens GN=EEF1G PE=1 SV=3	sp|P26641|EF1G_HUMAN	50 kDa	4.8593	0	6.253	4.1922	0	0	0			0	0	0		0	0	0		0	0	0		0	0	0		0	0	0		0	0	0			0	0	0		0	0	0		0	0	0		0
sp|P37802|TAGL2_HUMAN Transgelin-2 OS=Homo sapiens GN=TAGLN2 PE=1 SV=3	sp|P37802|TAGL2_HUMAN	22 kDa	0	0	0	0	0	0	0			0	0	0		0	0	0		0	0	0		0	0	0		0	0	0		0	0	1.1105			0	0	0		0	0	0		0	0	0		0
sp|P12814|ACTN1_HUMAN Alpha-actinin-1 OS=Homo sapiens GN=ACTN1 PE=1 SV=2	sp|P12814|ACTN1_HUMAN (+2)	103 kDa	7.2889	0	7.8162	8.3844	0	0	0			0	0	0		0	0	0		0	0	0		0	0	0		0	0	0		0	0	0			0	0	0		0	0	0		0	0	0		0
sp|P51659|DHB4_HUMAN Peroxisomal multifunctional enzyme type 2 OS=Homo sapiens GN=HSD17B4...	sp|P51659|DHB4_HUMAN	80 kDa	3.6445	0	0	4.1922	0	0	0			0	0	0		0	0	0		0	0	0		0	0	0		0	0	0		0	0	0			0	0	0		0	0	0		0	0	0		0
sp|O75223|GGCT_HUMAN Gamma-glutamylcyclotransferase OS=Homo sapiens GN=GGCT PE=1...	sp|O75223|GGCT_HUMAN (+2)	?	6.0741	0	0	6.987	0	0	0			0	0	0		0	0	0		0	0	0		0	0	0		0	0	0		0	0	0			0	0	0		0	0	0		0	0	0		0
sp|P48163|MAOX_HUMAN NADP-dependent malic enzyme OS=Homo sapiens GN=ME1 PE=1 SV=1	sp|P48163|MAOX_HUMAN	?	9.7185	0	0	8.3844	0	0	0			0	0	0		0	0	0		0	0	0		0	0	0		0	0	0		0	0	0			0	0	0		0	0	0		0	0	0		0
tr|E9PAV3|E9PAV3_HUMAN Nascent polypeptide-associated complex subunit alpha OS=Homo sapiens GN=NACA PE=4 SV=1	tr|E9PAV3|E9PAV3_HUMAN	205 kDa	3.6445	0	4.6897	0	2.7226	0	0			0	0	0		0	0	0		0	0	0		0	0	0		0	0	0		0	0	0			0	0	0		0	0	0		0	0	0		0
sp|Q92820|GGH_HUMAN Gamma-glutamyl hydrolase OS=Homo sapiens GN=GGH PE=1 SV=2	sp|Q92820|GGH_HUMAN	36 kDa	0	0	0	0	0	0	0			0	0	0		0	0	0		0	0	0		0	0	0		0	0	0		0	0	0			0	0	0		0	0	0		0	0	0		0
sp|O00303|EIF3F_HUMAN Eukaryotic translation initiation factor 3 subunit F OS=Homo...	sp|O00303|EIF3F_HUMAN (+1)	38 kDa	7.2889	0	6.253	0	0	0	0			0	0	0		0	0	0		0	0	0		0	0	0		0	0	0		0	0	0			0	0	0		0	0	0		0	0	0		0
sp|Q8IUE6|H2A2B_HUMAN Histone H2A type 2-B OS=Homo sapiens GN=HIST2H2AB PE=1 SV=3	sp|Q8IUE6|H2A2B_HUMAN	14 kDa	0	0	0	0	0	0	0			0	0	0		0	0	0		0	0	0		0	0	0		0	0	0		0	0	0			0	0	0		0	0	0		0	0	0		0
sp|P15880|RS2_HUMAN 40S ribosomal protein S2 OS=Homo sapiens GN=RPS2 PE=1 SV=2	sp|P15880|RS2_HUMAN	31 kDa	2.4296	0	0	4.1922	0	0	0			0	0	0		0	0	0		0	0	0		0	0	0		0	0	0		0	0	0			0	0	0		0	0	0		0	0	0		0
sp|Q7Z3Y8|K1C27_HUMAN Keratin, type I cytoskeletal 27 OS=Homo sapiens GN=KRT27 PE=1...	sp|Q7Z3Y8|K1C27_HUMAN	50 kDa	0	0	0	0	0	0	0			0	0	0		0	0	0		0	0	0		0	0	0		0	0	0		0	0	0			0	0	0		0	0	0		0	0	0		0
sp|Q99714|HCD2_HUMAN 3-hydroxyacyl-CoA dehydrogenase type-2 OS=Homo sapiens GN=HSD17B10 PE=1 SV=3	sp|Q99714|HCD2_HUMAN	27 kDa	2.4296	0	0	2.7948	0	0	0			0	0	0		0	0	0		0	0	0		0	0	0		0	0	0		0	0	2.7763			0	0	0		0	0	0		0	0	0		0
sp|P06702|S10A9_HUMAN Protein S100-A9 OS=Homo sapiens GN=S100A9 PE=1 SV=1	sp|P06702|S10A9_HUMAN	13 kDa	0	0	7.8162	4.1922	0	0	0			0	0	0		0	0	0		0	0	0		0	0	0		0	0	0		0	0	0			0	0	0		0	0	0		0	0	0		0
sp|P60409|KR107_HUMAN Keratin-associated protein 10-7 OS=Homo sapiens GN=KRTAP10-7 PE=2 SV=2	sp|P60409|KR107_HUMAN	38 kDa	0	0	0	0	4.0839	7.3995	10.818			0	0	0		0	0	0		0	0	0		0	0	0		0	0	0		0	0	0			0	0	0		0	0	0		0	0	0		0
sp|A8MX34|KR291_HUMAN Keratin-associated protein 29-1 OS=Homo sapiens GN=KRTAP29-1 PE=3 SV=1	sp|A8MX34|KR291_HUMAN	35 kDa	0	0	0	0	8.1678	14.799	0			0	0	0		0	0	0		0	0	0		0	0	0		0	0	0		0	0	0			0	0	0		0	0	0		0	0	0		0
sp|Q6L8H2|KRA53_HUMAN Keratin-associated protein 5-3 OS=Homo sapiens GN=KRTAP5-3 PE=2 SV=1	sp|Q6L8H2|KRA53_HUMAN	22 kDa	0	0	0	0	4.0839	11.099	5.4089			0	0	0		0	0	0		0	0	0		0	0	0		0	0	0		0	0	0			0	0	0		0	0	0		0	0	0		0
sp|P04083|ANXA1_HUMAN Annexin A1 OS=Homo sapiens GN=ANXA1 PE=1 SV=2	sp|P04083|ANXA1_HUMAN	39 kDa	0	0	0	0	0	0	0			0	0	0		0	0	0		0	0	0		0	0	0		0	0	0		0	0	0			0	0	0		0	0	0		0	0	0		0
sp|P49674|KC1E_HUMAN Casein kinase I isoform epsilon OS=Homo sapiens GN=CSNK1E PE=1...	sp|P49674|KC1E_HUMAN	47 kDa	4.8593	0	3.1265	4.1922	0	0	0			0	0	0		0	0	0		0	0	0		0	0	0		0	0	0		0	0	0			0	0	0		0	0	0		0	0	0		0
tr|F5GWP8|F5GWP8_HUMAN Junction plakoglobin OS=Homo sapiens GN=JUP PE=3 SV=1	tr|F5GWP8|F5GWP8_HUMAN	66 kDa	0	0	6.253	0	0	0	0			0	0	0		0	0	0		0	0	0		0	0	0		0	0	0		0	0	0			0	0	0		0	0	0		0	0	0		0
sp|Q14152|EIF3A_HUMAN Eukaryotic translation initiation factor 3 subunit A OS=Homo...	sp|Q14152|EIF3A_HUMAN (+1)	?	7.2889	0	4.6897	0	0	0	0			0	0	0		0	0	0		0	0	0		0	0	0		0	0	0		0	0	0			0	0	0		0	0	0		0	0	0		0
sp|P63244|GBLP_HUMAN Guanine nucleotide-binding protein subunit beta-2-like 1 OS=Homo sapiens GN=GNB2L1 PE=1 SV=3	sp|P63244|GBLP_HUMAN	35 kDa	7.2889	0	0	0	4.0839	0	0			0	0	0		0	0	0		0	0	0		0	0	0		0	0	0		0	0	0			0	0	0		0	0	0		0	0	0		0
sp|Q96KP4|CNDP2_HUMAN Cytosolic non-specific dipeptidase OS=Homo sapiens GN=CNDP2...	sp|Q96KP4|CNDP2_HUMAN	?	6.0741	0	6.253	0	0	0	0			0	0	0		0	0	0		0	0	0		0	0	0		0	0	0		0	0	0			0	0	0		0	0	0		0	0	0		0
sp|P49720|PSB3_HUMAN Proteasome subunit beta type-3 OS=Homo sapiens GN=PSMB3 PE=1...	sp|P49720|PSB3_HUMAN (+1)	23 kDa	8.5037	0	4.6897	0	0	0	0			0	0	0		0	0	0		0	0	0		0	0	0		0	0	0		0	0	0			0	0	0		0	0	0		0	0	0		0
sp|Q86YZ3|HORN_HUMAN Hornerin OS=Homo sapiens GN=HRNR PE=1 SV=2	sp|Q86YZ3|HORN_HUMAN	282 kDa	0	0	0	0	0	7.3995	7.2119			0	0	0		0	0	0		0	0	0		0	0	0		0	0	0		0	0	0			0	0	0		0	0	0		0	0	0		0
sp|P62701|RS4X_HUMAN 40S ribosomal protein S4, X isoform OS=Homo sapiens GN=RPS4X...	sp|P62701|RS4X_HUMAN	?	6.0741	0	0	6.987	0	0	0			0	0	0		0	0	0		0	0	0		0	0	0		0	0	0		0	0	0			0	0	0		0	0	0		0	0	0		0
sp|P43155|CACP_HUMAN Carnitine O-acetyltransferase OS=Homo sapiens GN=CRAT PE=1 SV=5	sp|P43155|CACP_HUMAN	71 kDa	3.6445	0	0	6.987	0	0	0			0	0	0		0	0	0		0	0	0		0	0	0		0	0	0		0	0	0			0	0	0		0	0	0		0	0	0		0
sp|P06744|G6PI_HUMAN Glucose-6-phosphate isomerase OS=Homo sapiens GN=GPI PE=1 SV=4	sp|P06744|G6PI_HUMAN	?	4.8593	0	3.1265	0	0	0	0			0	0	0		0	0	0		0	0	0		0	0	0		0	0	0		0	0	0			0	0	0		0	0	0		0	0	0		0
sp|P62266|RS23_HUMAN 40S ribosomal protein S23 OS=Homo sapiens GN=RPS23 PE=1 SV=3	sp|P62266|RS23_HUMAN	?	4.8593	0	0	6.987	0	0	0			0	0	0		0	0	0		0	0	0		0	0	0		0	0	0		0	0	0			0	0	0		0	0	0		0	0	0		0
sp|Q14974|IMB1_HUMAN Importin subunit beta-1 OS=Homo sapiens GN=KPNB1 PE=1 SV=2	sp|Q14974|IMB1_HUMAN	97 kDa	0	0	3.1265	2.7948	0	0	0			0	0	0		0	0	0		0	0	0		0	0	0		0	0	0		0	0	0			0	0	0		0	0	0		0	0	0		0
sp|P62241|RS8_HUMAN 40S ribosomal protein S8 OS=Homo sapiens GN=RPS8 PE=1 SV=2	sp|P62241|RS8_HUMAN (+1)	24 kDa	4.8593	0	0	2.7948	0	0	0			0	0	0		0	0	0		0	0	0		0	0	0		0	0	0		0	0	0			0	0	0		0	0	0		0	0	0		0
sp|P00505|AATM_HUMAN Aspartate aminotransferase, mitochondrial OS=Homo sapiens GN=GOT2...	sp|P00505|AATM_HUMAN	?	3.6445	0	0	2.7948	0	0	0			0	0	0		0	0	0		0	0	0		0	0	0		0	0	0		0	0	0			0	0	0		0	0	0		0	0	0		0
sp|P09382|LEG1_HUMAN Galectin-1 OS=Homo sapiens GN=LGALS1 PE=1 SV=2	sp|P09382|LEG1_HUMAN	?	2.4296	0	0	4.1922	0	0	0			0	0	0		0	0	0		0	0	0		0	0	0		0	0	0		0	0	0			0	0	0		0	0	0		0	0	0		0
sp|P07686|HEXB_HUMAN Beta-hexosaminidase subunit beta OS=Homo sapiens GN=HEXB PE=1...	sp|P07686|HEXB_HUMAN (+2)	?	0	0	0	0	0	0	0			0	0	0		0	1.8018	0		0	0	0		0	0	0		0	0	0		0	0	0			0	0	0		0	0	0		0	0	2.9151		0
sp|P62277|RS13_HUMAN 40S ribosomal protein S13 OS=Homo sapiens GN=RPS13 PE=1 SV=2	sp|P62277|RS13_HUMAN (+1)	?	2.4296	0	3.1265	0	0	0	0			0	0	0		0	0	0		0	0	0		0	0	0		0	0	0		0	0	0			0	0	0		0	0	0		0	0	0		0
sp|P32969|RL9_HUMAN 60S ribosomal protein L9 OS=Homo sapiens GN=RPL9 PE=1 SV=1	sp|P32969|RL9_HUMAN (+2)	?	3.6445	0	0	4.1922	0	0	0			0	0	0		0	0	0		0	0	0		0	0	0		0	0	0		0	0	0			0	0	0		0	0	0		0	0	0		0
sp|Q8IUB9|KR191_HUMAN Keratin-associated protein 19-1 OS=Homo sapiens GN=KRTAP19-1...	sp|Q8IUB9|KR191_HUMAN	?	0	0	0	0	0	0	0			0	0	0		0	0	0		0	0	0		0	0	0		0	0	0		0	0	0			0	0	0		0	0	0		0	0	0		0
[truncated: 47 more columns]
