# Supplementary material for: Human hair shaft proteomic profiling: individual differences, site specificity and cuticle analysis
Source: PeerJ. 2014 Aug 5;2:e506. doi: 10.7717/peerj.506 (PMC4137660; doi:10.7717/peerj.506)
Supplement: Table S2 [file peerj-02-506-s002.xlsx]

## Sheet: Sheet1
Supplemental Tables S2. Pairwise comparisons among Caucasian samples
Identified Proteins	Accession	MW	Global P-Value Subject Effect	P-Value C2 - C1	Dir. Reg. C2 - C1	P-Value C3 - C1	Dir. Reg. C3 - C1	P-Value C4 - C1	Dir. Reg. C4 - C1	P-Value C5 - C1	Dir. Reg. C5 - C1	P-Value C7 - C1	Dir. Reg. C7 - C1	P-Value C3 - C2	Dir. Reg. C3 - C2	P-Value C4 - C2	Dir. Reg. C4 - C2	P-Value C5 - C2	Dir. Reg. C5 - C2	P-Value C7 - C2	Dir. Reg. C7 - C2	P-Value C4 - C3	Dir. Reg. C4 - C3	P-Value C5 - C3	Dir. Reg. C5 - C3	P-Value C7 - C3	Dir. Reg. C7 - C3	P-Value C5 - C4	Dir. Reg. C5 - C4	P-Value C7 - C4	Dir. Reg. C7 - C4	P-Value C7 - C5	Dir. Reg. C7 - C5
Keratin, type II cuticular Hb6 OS=Homo sapiens GN=KRT86 PE=1 SV=1	KRT86_HUMAN	53 kDa	0	0.00108592	1	0.000356881	1	0.000340388	-1	0	1	0	1	0.999875	1	3.10862e-15	-1	0	1	0	1	2.77556e-15	-1	0	1	0	1	0	1	0	1	0	1
Keratin, type I cuticular Ha3-II OS=Homo sapiens GN=KRT33B PE=2 SV=3	KT33B_HUMAN	46 kDa	1.66526e-180	0.0119424	1	0.103698	1	0.0928064	-1	0	1	0	1	0.97571	-1	2.77232e-08	-1	1.11022e-16	1	0	1	8.28741e-06	-1	0	1	0	1	0	1	0	1	0	1
Keratin, type II cuticular Hb5 OS=Homo sapiens GN=KRT85 PE=1 SV=1	KRT85_HUMAN	56 kDa	7.59624e-43	0.995435	-1	0.465843	-1	0.0038543	-1	2.89969e-05	1	2.22045e-16	1	0.795464	-1	0.0231031	-1	1.87077e-06	1	2.22045e-16	1	0.444404	-1	4.63085e-10	1	0	1	6.66134e-16	1	0	1	0.00273388	1
Keratin, type I cuticular Ha1 OS=Homo sapiens GN=KRT31 PE=2 SV=3	K1H1_HUMAN	47 kDa	4.87302e-80	0.0132063	1	0.187493	1	5.69139e-10	-1	0	1	0	1	0.923995	-1	0	-1	9.0715e-10	1	9.41034e-11	1	1.11022e-16	-1	1.526e-12	1	6.91669e-14	1	0	1	0	1	0.998907	1
Keratin, type I cuticular Ha4 OS=Homo sapiens GN=KRT34 PE=3 SV=1	C4AMA3_HUMAN	45 kDa	3.60209e-44	0.310467	1	0.999997	-1	0.103346	1	0	1	0	1	0.251499	-1	0.995203	1	3.34177e-14	1	1.75926e-12	1	0.0774714	1	0	1	0	1	8.0258e-13	1	7.22733e-11	1	0.991176	-1
Keratin-associated protein 9-9 OS=Homo sapiens GN=KRTAP9-9 PE=4 SV=1	C9JDV2_HUMAN	18 kDa	0.0257844	0.982117	1	0.161858	1	0.999543	1	0.940744	-1	0.893659	1	0.521728	1	0.999002	-1	0.593114	-1	0.999057	1	0.298121	-1	0.0160986	-1	0.757041	-1	0.817209	-1	0.975488	1	0.361319	1
Keratin, type II cuticular Hb3 OS=Homo sapiens GN=KRT83 PE=1 SV=2	KRT83_HUMAN	54 kDa	3.66205e-98	1.05496e-10	1	0.00127572	1	0.26361	1	0	1	0	1	0.0273467	-1	2.11677e-05	-1	0.275983	1	0	1	0.436874	-1	4.29235e-06	1	0	1	8.88182e-11	1	0	1	0	1
Keratin, type II cuticular Hb1 OS=Homo sapiens GN=KRT81 PE=1 SV=3	KRT81_HUMAN	55 kDa	1.13995e-170	0.862573	-1	0.718951	1	0.0600972	1	1.55431e-14	1	0	1	0.112752	1	0.00144928	1	0	1	0	1	0.732137	1	3.99701e-10	1	0	1	1.8363e-06	1	0	1	0	1
Keratin, type II cuticular Hb2 OS=Homo sapiens GN=KRT82 PE=1 SV=3	KRT82_HUMAN	57 kDa	8.34023e-07	0.803842	-1	0.999223	1	2.19425e-05	-1	0.169665	-1	0.960525	-1	0.582784	1	0.00405188	-1	0.881039	-1	0.998172	1	3.75857e-06	-1	0.0716861	-1	0.838912	-1	0.114718	1	0.000779013	1	0.645558	1
Keratin, type I cuticular Ha3-I OS=Homo sapiens GN=KRT33A PE=2 SV=2	KT33A_HUMAN	46 kDa	1.98053e-18	0.653742	1	0.981982	1	0.883481	1	4.7653e-12	1	2.06661e-05	1	0.963831	-1	0.998251	-1	2.35796e-08	1	0.00960656	1	0.998738	1	1.81484e-10	1	0.000456969	1	7.49913e-09	1	0.00213664	1	0.0734601	-1
Keratin-associated protein 9-3 OS=Homo sapiens GN=KRTAP9-3 PE=1 SV=1	KRA93_HUMAN	17 kDa	0.0610134	0.999996	1	0.914203	1	0.946371	1	0.862124	-1	0.444198	1	0.948542	1	0.970803	1	0.804133	-1	0.521474	1	0.999998	-1	0.266887	-1	0.961794	1	0.32465	-1	0.935511	1	0.0391717	1
Keratin, type I cuticular Ha8 OS=Homo sapiens GN=KRT38 PE=2 SV=3	KRT38_HUMAN	50 kDa	2.80304e-07	0.465176	1	0.176912	1	0.146404	-1	0.602099	1	0.0225766	1	0.993427	1	0.000697981	-1	0.999943	-1	0.741329	1	9.55447e-05	-1	0.97223	-1	0.964111	1	0.00166863	1	4.64787e-06	1	0.609058	1
Keratin, type I cuticular Ha5 OS=Homo sapiens GN=KRT35 PE=2 SV=5	KRT35_HUMAN	50 kDa	2.48261e-65	0.402617	1	0.999699	1	1.63862e-08	-1	1.0012e-11	1	0	1	0.594416	-1	3.14193e-14	-1	2.26226e-06	1	1.61648e-13	1	1.12512e-09	-1	1.50003e-09	1	0	1	0	1	0	1	0.134548	1
Desmoplakin OS=Homo sapiens GN=DSP PE=1 SV=3	DESP_HUMAN	332 kDa	0.067224	0.985426	-1	0.986546	1	0.959707	-1	0.954707	1	0.453524	1	0.774768	1	0.999978	-1	0.647989	1	0.135902	1	0.670723	-1	0.999944	1	0.849542	1	0.534578	1	0.0910375	1	0.928862	1
Keratin-associated protein 3-1 OS=Homo sapiens GN=KRTAP3-1 PE=1 SV=1	KRA31_HUMAN	11 kDa	5.3941e-37	0.426944	1	0.168257	1	0.999999	1	0	1	1.41701e-10	1	0.9957	1	0.478916	-1	6.66134e-16	1	6.09458e-06	1	0.199897	-1	2.45359e-14	1	6.94952e-05	1	0	1	1.40161e-10	1	0.00866746	-1
Keratin-associated protein 2-4 OS=Homo sapiens GN=KRTAP2-4 PE=2 SV=1	KRA24_HUMAN	13 kDa	1.64585e-12	0.105313	1	2.68696e-05	1	0.928299	-1	0.280832	1	0.353282	-1	0.220629	1	0.00607451	-1	0.997413	-1	0.000109581	-1	1.89574e-07	-1	0.0769376	-1	1.90778e-10	-1	0.0264047	1	0.91171	-1	0.000736096	-1
Keratin, type I cytoskeletal 39 OS=Homo sapiens GN=KRT39 PE=1 SV=2	K1C39_HUMAN	56 kDa	4.43937e-08	0.858513	-1	1	-1	0.032668	-1	0.0134663	1	0.999529	-1	0.891964	1	0.429951	-1	0.00017164	1	0.961878	1	0.0413765	-1	0.0102539	1	0.999884	-1	8.63315e-09	1	0.0798464	1	0.00439869	-1
Keratin, type I cuticular Ha2 OS=Homo sapiens GN=KRT32 PE=1 SV=3	K1H2_HUMAN	50 kDa	2.1616e-17	0.517044	-1	0.756447	1	2.93787e-05	-1	0.768628	-1	0.00123206	1	0.0269475	1	0.0265489	-1	0.998778	1	3.24741e-07	1	3.76343e-08	-1	0.0809993	-1	0.100346	1	0.00743441	1	8.88178e-16	1	2.01263e-06	1
Histone H2A type 1-C OS=Homo sapiens GN=HIST1H2AC PE=1 SV=3	H2A1C_HUMAN	14 kDa	0.0746151	0.999521	-1	0.848718	-1	0.999826	1	0.874558	-1	0.136333	-1	0.957459	-1	0.991779	1	0.968652	-1	0.263157	-1	0.70423	1	1	1	0.778457	-1	0.739742	-1	0.072805	-1	0.744947	-1
Keratin-associated protein 4-3 OS=Homo sapiens GN=KRTAP4-3 PE=2 SV=2	KRA43_HUMAN	21 kDa	0.000774774	0.949124	-1	0.999934	-1	0.391951	-1	0.991922	-1	0.167712	1	0.984914	1	0.90576	-1	0.999658	1	0.0157885	1	0.529795	-1	0.9991	-1	0.102398	1	0.764153	1	0.000403513	1	0.0389282	1
V-set and immunoglobulin domain-containing protein 8 OS=Homo sapiens GN=VSIG8 PE=1 SV=1	VSIG8_HUMAN	44 kDa	1.35105e-05	0.130027	-1	0.98886	1	0.802003	-1	0.999991	-1	0.0978219	1	0.0249706	1	0.820983	1	0.177893	1	7.9184e-06	1	0.407449	-1	0.972091	-1	0.35322	1	0.870616	1	0.00199602	1	0.0681206	1
Histone H2B type 1-N OS=Homo sapiens GN=HIST1H2BN PE=1 SV=3	H2B1N_HUMAN	14 kDa	0.159531	0.823324	-1	0.578554	-1	0.999048	-1	0.999683	-1	0.954759	1	0.998606	-1	0.956959	1	0.938802	1	0.294828	1	0.807679	1	0.766378	1	0.129183	1	1	1	0.818183	1	0.854502	1
Protein S100-A3 OS=Homo sapiens GN=S100A3 PE=1 SV=1	S10A3_HUMAN	12 kDa	0.43758	0.908886	-1	0.74927	-1	0.884036	-1	0.436671	-1	0.999867	-1	0.999422	-1	1	-1	0.963008	-1	0.971302	1	0.999804	1	0.996606	-1	0.875649	1	0.974333	-1	0.959108	1	0.599897	1
Keratin-associated protein 3-3 OS=Homo sapiens GN=KRTAP3-3 PE=1 SV=1	KRA33_HUMAN	10 kDa	4.28459e-06	0.999734	-1	0.974148	1	1	1	0.000194386	1	0.885788	1	0.902222	1	0.999221	1	5.38963e-05	1	0.742057	1	0.983259	-1	0.0036477	1	0.999472	1	0.000281452	1	0.911799	1	0.0113404	-1
Selenium-binding protein 1 OS=Homo sapiens GN=SELENBP1 PE=1 SV=2	SBP1_HUMAN	52 kDa	0.000340856	0.994161	1	0.995149	-1	0.998583	-1	0.0181988	1	0.459052	1	0.893639	-1	0.933068	-1	0.078012	1	0.797334	1	0.999997	1	0.00375801	1	0.190576	1	0.00541926	1	0.239438	1	0.692014	-1
Junction plakoglobin OS=Homo sapiens GN=JUP PE=1 SV=3	PLAK_HUMAN	82 kDa	0.014622	0.933594	-1	0.967646	1	0.470582	1	0.980418	1	0.179438	1	0.503873	1	0.0716822	1	0.56077	1	0.0145912	1	0.918235	1	0.999999	-1	0.631604	1	0.887231	-1	0.993827	1	0.574679	1
14-3-3 protein sigma OS=Homo sapiens GN=SFN PE=1 SV=1	1433S_HUMAN	28 kDa	0.037993	0.999438	1	0.556549	1	0.999999	-1	0.702576	1	0.102079	1	0.767686	1	0.998315	-1	0.8787	1	0.21317	1	0.500484	-1	0.99992	-1	0.936845	1	0.64865	1	0.0829137	1	0.854792	1
Keratin-associated protein 9-2 OS=Homo sapiens GN=KRTAP9-2 PE=1 SV=2	KRA92_HUMAN	18 kDa	0.000605849	0.985873	1	0.357569	1	0.54722	1	0.242426	-1	0.985866	1	0.775396	1	0.912024	1	0.0525216	-1	1	-1	0.999672	-1	0.000640709	-1	0.775434	-1	0.00210919	-1	0.912021	-1	0.0525621	1
Desmoglein-4 OS=Homo sapiens GN=DSG4 PE=1 SV=1	DSG4_HUMAN	114 kDa	7.73401e-09	0.0094431	-1	0.929834	-1	0.999851	-1	0.0201492	1	0.986064	1	0.132467	1	0.020569	1	3.11552e-09	1	0.000936094	1	0.981196	1	0.000685458	1	0.586435	1	0.00889438	1	0.942403	1	0.120412	-1
Keratin-associated protein 11-1 OS=Homo sapiens GN=KRTAP11-1 PE=1 SV=1	KR111_HUMAN	17 kDa	6.46841e-22	1	1	0.985813	-1	5.39e-07	-1	0.083313	1	0.000471442	1	0.985814	-1	4.70752e-07	-1	0.0834695	1	0.000533725	1	2.00392e-05	-1	0.0122442	1	2.50328e-05	1	3.4639e-14	1	0	1	0.638133	1
Keratin-associated protein 9-8 OS=Homo sapiens GN=KRTAP9-8 PE=2 SV=2	KRA98_HUMAN	17 kDa	0.000210455	0.999333	-1	0.992026	1	0.00190239	1	0.985542	1	0.962529	1	0.938357	1	0.000554966	1	0.913823	1	0.84975	1	0.0140712	1	0.999999	1	0.999886	1	0.0179141	-1	0.029084	-1	0.999985	1
Keratin-associated protein 9-4 OS=Homo sapiens GN=KRTAP9-4 PE=2 SV=2	KRA94_HUMAN	16 kDa	0.17248	0.23241	1	0.466587	1	0.971636	1	0.232415	1	0.747822	1	0.998237	-1	0.692898	-1	1	1	0.954582	-1	0.90643	-1	0.998237	1	0.997888	-1	0.692865	1	0.991412	1	0.954591	-1
Keratin-associated protein 9-7 OS=Homo sapiens GN=KRTAP9-7 PE=3 SV=1	KRA97_HUMAN	18 kDa	6.13682e-58	0.00112853	1	0.000890004	1	0	1	0.734469	1	0.00706875	-1	0.999998	1	1.45572e-12	1	0.0760114	-1	3.64218e-09	-1	2.3137e-12	1	0.0589126	-1	2.7961e-09	-1	0	-1	0	-1	0.000106772	-1
Putative keratin-associated protein 10-like ENSP00000375147 OS=Homo sapiens PE=3 SV=1	KR10D_HUMAN	54 kDa	0.0112117	0.823835	-1	0.999592	-1	0.0162678	-1	0.997618	-1	0.708647	-1	0.942224	1	0.256554	-1	0.970927	1	0.999946	-1	0.036358	-1	0.999993	-1	0.87211	-1	0.0506011	1	0.359225	1	0.922395	-1
Dual specificity protein phosphatase 14 OS=Homo sapiens GN=DUSP14 PE=1 SV=1	DUS14_HUMAN (+1)	22 kDa	0.000321817	0.999921	1	0.992366	-1	0.99367	1	0.999921	1	0.0050067	-1	0.966734	-1	0.999471	1	1	1	0.00230233	-1	0.866842	1	0.96673	1	0.031087	-1	0.999471	-1	0.000674118	-1	0.00237571	-1
Keratin-associated protein 13-2 OS=Homo sapiens GN=KRTAP13-2 PE=1 SV=1	KR132_HUMAN	19 kDa	2.63912e-08	1	1	0.0987284	1	0.5275	1	0.76044	1	0.00964991	-1	0.0986225	1	0.527472	1	0.760432	1	0.00966073	-1	0.938808	-1	0.786433	-1	1.54124e-06	-1	0.999079	-1	4.07664e-05	-1	0.00013878	-1
Plakophilin-1 OS=Homo sapiens GN=PKP1 PE=1 SV=2	PKP1_HUMAN	83 kDa	0.409807	0.990423	1	0.999588	-1	0.715662	-1	0.998537	1	0.999945	-1	0.940652	-1	0.33132	-1	0.999956	-1	0.964356	-1	0.879077	-1	0.979104	1	0.999998	1	0.45101	1	0.831545	1	0.989751	-1
Keratin-associated protein 7-1 OS=Homo sapiens GN=KRTAP7-1 PE=2 SV=2	KRA71_HUMAN	9 kDa	0.013615	0.743936	-1	0.999999	-1	0.967823	1	0.469223	-1	0.223583	-1	0.79568	1	0.261439	1	0.998073	-1	0.949827	-1	0.948857	1	0.528681	-1	0.265355	-1	0.106785	-1	0.0342231	-1	0.997553	-1
Keratin, type I cytoskeletal 40 OS=Homo sapiens GN=KRT40 PE=1 SV=2	K1C40_HUMAN	48 kDa	0.0265618	0.848932	-1	0.954188	1	0.987515	1	0.405227	-1	0.84893	-1	0.333948	1	0.464776	1	0.975686	-1	1	1	0.999924	-1	0.0757743	-1	0.334195	-1	0.125775	-1	0.464721	-1	0.975684	1
Histone H4 OS=Homo sapiens GN=HIST1H4L PE=2 SV=1	B2R4R0_HUMAN (+2)	11 kDa	0.312776	0.730182	-1	0.637803	-1	0.998578	-1	0.999822	1	1	-1	0.999991	-1	0.921247	1	0.559454	1	0.730235	1	0.866225	1	0.463105	1	0.637781	1	0.984995	1	0.998578	1	0.999822	-1
Keratin-associated protein 9-6 OS=Homo sapiens GN=KRTAP9-6 PE=3 SV=1	KRA96_HUMAN	17 kDa	0.548949	0.531808	1	0.98785	1	0.923041	1	0.978445	1	0.633609	1	0.892278	-1	0.978254	-1	0.922522	-1	0.999987	-1	0.999353	1	0.999999	1	0.942304	1	0.999846	-1	0.992753	1	0.962043	1
Keratin-associated protein 13-1 OS=Homo sapiens GN=KRTAP13-1 PE=2 SV=2	KR131_HUMAN	18 kDa	0.724691	1	-1	0.995714	-1	0.997108	1	0.94493	1	0.977378	1	0.995713	-1	0.997108	1	0.944926	1	0.977375	1	0.925006	1	0.72512	1	0.818331	1	0.997943	1	0.999817	1	0.999979	-1
Keratin-associated protein 19-5 OS=Homo sapiens GN=KRTAP19-5 PE=1 SV=1	KR195_HUMAN	8 kDa	0.225718	1	1	0.999999	1	0.470046	1	0.853511	1	0.999967	-1	0.999999	1	0.469968	1	0.853532	1	0.999967	-1	0.526596	1	0.89122	1	0.999764	-1	0.986438	-1	0.362025	-1	0.758936	-1
Hephaestin-like protein 1 OS=Homo sapiens GN=HEPHL1 PE=2 SV=2	HPHL1_HUMAN	132 kDa	0.656952	0.767637	-1	0.895591	-1	0.993808	-1	0.999988	-1	1	1	0.999784	1	0.969376	1	0.845538	1	0.767621	1	0.995565	1	0.943327	1	0.895615	1	0.998673	1	0.993809	1	0.999988	1
Protein-glutamine gamma-glutamyltransferase E OS=Homo sapiens GN=TGM3 PE=1 SV=4	TGM3_HUMAN	77 kDa	0.221067	0.899175	1	0.80046	-1	0.997087	-1	0.9732	-1	0.999174	1	0.193195	-1	0.65057	-1	0.459759	-1	0.982792	-1	0.966932	1	0.995792	1	0.579044	1	0.999705	-1	0.961088	1	0.870386	1
Glyceraldehyde-3-phosphate dehydrogenase OS=Homo sapiens GN=GAPDH PE=1 SV=3	G3P_HUMAN	36 kDa	0.952557	0.993271	1	0.999999	-1	0.999741	1	0.99327	1	0.99996	-1	0.98604	-1	0.999776	-1	1	1	0.974134	-1	0.998923	1	0.98603	1	0.999999	-1	0.999776	1	0.996784	-1	0.974135	-1
Keratin, type I cuticular Ha7 OS=Homo sapiens GN=KRT37 PE=2 SV=3	KRT37_HUMAN	50 kDa	6.97132e-06	1	1	0.965551	-1	0.976013	1	0.705791	1	0.00419128	-1	0.965548	-1	0.976009	1	0.705797	1	0.00420127	-1	0.633429	1	0.22953	1	0.0386019	-1	0.982525	1	0.000383089	-1	5.53515e-05	-1
Calmodulin-like protein 3 OS=Homo sapiens GN=CALML3 PE=1 SV=2	CALL3_HUMAN	17 kDa	0.00379548	0.999823	-1	0.998882	1	0.815575	-1	0.26675	1	0.388478	1	0.98694	1	0.92436	-1	0.157275	1	0.246904	1	0.582288	-1	0.490688	1	0.636765	1	0.0113912	1	0.0227364	1	0.999925	-1
Core histone macro-H2A.1 OS=Homo sapiens GN=H2AFY PE=1 SV=4	H2AY_HUMAN	40 kDa	1.23744e-08	1	1	0.990071	1	0.803047	1	1	-1	0.00018327	-1	0.990069	1	0.803102	1	1	-1	0.000227675	-1	0.98632	1	0.990067	-1	2.16273e-05	-1	0.803186	-1	3.188e-06	-1	0.000189355	-1
Keratin, type II cytoskeletal 7 OS=Homo sapiens GN=KRT7 PE=4 SV=1	F5GZD1_HUMAN	45 kDa	0.00232036	0.960111	1	0.992102	-1	0.994638	1	0.0535665	1	0.981182	-1	0.721009	-1	0.999651	-1	0.30886	1	0.645933	-1	0.875594	1	0.0117681	1	0.999996	-1	0.177258	1	0.819867	-1	0.00829495	-1
cDNA FLJ43122 fis, clone CTONG3003737, highly similar to Leucine-rich repeat-containing protein 15 OS=Homo sapiens PE=2 SV=1	B3KWI4_HUMAN (+1)	64 kDa	0.497221	0.833918	-1	0.992087	-1	0.999457	1	1	1	0.833955	-1	0.989017	1	0.643113	1	0.833946	1	1	1	0.94259	1	0.99209	1	0.989017	-1	0.999457	-1	0.643085	-1	0.833944	-1
Histone H2A type 2-A OS=Homo sapiens GN=HIST2H2AA3 PE=1 SV=3	H2A2A_HUMAN (+1)	14 kDa	0.0712005	1	1	0.999999	-1	0.867465	1	0.999097	1	0.379446	-1	0.999999	-1	0.86746	1	0.999097	1	0.379455	-1	0.823702	1	0.997276	1	0.433699	-1	0.97273	-1	0.0399822	-1	0.206768	-1
Histone H3 OS=Homo sapiens GN=H3F3A PE=2 SV=1	B2R4P9_HUMAN (+2)	15 kDa	0.000133763	0.99601	-1	0.999029	-1	0.0653716	1	0.757083	1	0.594356	-1	0.999995	1	0.016894	1	0.440895	1	0.874967	-1	0.0242916	1	0.522065	1	0.815922	-1	0.690328	-1	0.00050934	-1	0.0474378	-1
Histone H3.1 OS=Homo sapiens GN=HIST1H3A PE=1 SV=2	H31_HUMAN	15 kDa	0.629298	0.979146	-1	0.992743	1	0.951593	1	0.999981	1	0.999292	-1	0.793054	1	0.610787	1	0.948977	1	0.999058	1	0.99963	1	0.998604	-1	0.941012	-1	0.98059	-1	0.825383	-1	0.995381	-1
Protein FAM26D OS=Homo sapiens GN=FAM26D PE=1 SV=1	FA26D_HUMAN	35 kDa	0.0383746	0.546001	-1	0.495103	-1	0.305397	-1	0.740626	-1	0.0233668	-1	1	-1	0.998422	-1	0.999594	1	0.584244	-1	0.999446	-1	0.998763	1	0.634571	-1	0.978587	1	0.822845	-1	0.395647	-1
Keratin-associated protein 9-1 OS=Homo sapiens GN=KRTAP9-1 PE=3 SV=1	KRA91_HUMAN	26 kDa	0.221334	0.99985	-1	0.98664	-1	0.999995	-1	0.996456	1	0.369745	-1	0.998698	-1	0.999995	1	0.975839	1	0.526688	-1	0.995061	1	0.8632	1	0.773804	-1	0.989662	1	0.445305	-1	0.150517	-1
cDNA, FLJ93005, highly similar to Homo sapiens tubulin, beta polypeptide (TUBB), mRNA OS=Homo sapiens PE=2 SV=1	B2R6L0_HUMAN (+1)	50 kDa	0.631581	1	1	0.999193	1	0.991524	1	0.632637	1	0.981278	1	0.999193	1	0.991523	1	0.632684	1	0.981276	1	0.999908	1	0.839004	1	0.999353	1	0.928285	1	0.999997	1	0.956966	-1
Fatty acid binding protein 4, adipocyte OS=Homo sapiens GN=FABP4 PE=3 SV=1	E7DVW4_HUMAN (+1)	15 kDa	6.97132e-06	1	1	0.965558	-1	0.976008	1	0.705724	1	0.00417306	-1	0.965556	-1	0.976011	1	0.705773	1	0.0041325	-1	0.633388	1	0.229642	1	0.0384397	-1	0.982522	1	0.00039862	-1	4.45848e-05	-1
Peroxiredoxin-6 OS=Homo sapiens GN=PRDX6 PE=1 SV=3	PRDX6_HUMAN	25 kDa	0.00431239	0.983955	-1	0.526349	-1	0.998336	-1	0.996909	1	0.0295608	-1	0.902709	-1	0.99983	1	0.857809	1	0.142144	-1	0.784082	1	0.256379	1	0.678792	-1	0.947509	1	0.0809209	-1	0.00795662	-1
Keratin-associated protein 10-10 OS=Homo sapiens GN=KRTAP10-10 PE=1 SV=1	KR10A_HUMAN	26 kDa	0.0358704	1	-1	0.995094	-1	0.996687	1	0.938071	1	0.147576	1	0.995095	-1	0.996687	1	0.938061	1	0.147567	1	0.915986	1	0.700217	1	0.0464634	1	0.99764	1	0.351737	1	0.62803	1
Galectin-7 OS=Homo sapiens GN=LGALS7 PE=1 SV=2	LEG7_HUMAN	15 kDa	0.000957796	1	1	0.703887	-1	0.971153	-1	0.0793606	1	1	1	0.703865	-1	0.971152	-1	0.0793001	1	1	-1	0.985768	1	0.000787086	1	0.703923	1	0.00835635	1	0.971155	1	0.0793013	-1
Tubulin alpha-1B chain OS=Homo sapiens GN=TUBA1B PE=1 SV=1	TBA1B_HUMAN	50 kDa	0.910003	0.975574	1	0.986064	1	0.996859	1	0.940826	1	1	1	0.999999	-1	0.9998	-1	0.999977	1	0.975573	-1	0.999972	-1	0.999825	1	0.986063	-1	0.997764	1	0.996859	-1	0.940828	-1
Type II hair keratin 1 (Fragment) OS=Homo sapiens GN=KRTHB1 PE=2 SV=1	Q9NSB5_HUMAN	13 kDa	1.92466e-12	0.0124403	1	0.99994	-1	0.913226	1	0.371956	1	9.79295e-09	1	0.00625441	-1	0.184188	-1	0.730477	-1	0.0303795	1	0.82407	1	0.257761	1	5.22632e-09	1	0.934755	1	2.43377e-06	1	0.000187839	1
Keratin, type I cytoskeletal 10 OS=Homo sapiens GN=KRT10 PE=1 SV=6	K1C10_HUMAN	59 kDa	4.40618e-05	1	-1	0.996028	-1	0.997321	1	0.0816538	1	0.216968	-1	0.996027	-1	0.997322	1	0.0815943	1	0.216872	-1	0.929839	1	0.0253973	1	0.445786	-1	0.209095	1	0.0958545	-1	0.000583004	-1
Keratin-associated protein 10-12 OS=Homo sapiens GN=KRTAP10-12 PE=1 SV=1	KR10C_HUMAN	25 kDa	0.037845	0.0737452	-1	0.981258	-1	0.111314	-1	0.86174	-1	0.957632	-1	0.329792	1	0.999981	1	0.606877	1	0.415017	1	0.429313	-1	0.997876	-1	0.999991	-1	0.7145	1	0.523045	1	0.999695	1
Bleomycin hydrolase OS=Homo sapiens GN=BLMH PE=1 SV=1	BLMH_HUMAN	53 kDa	0.88415	0.999215	-1	0.907329	-1	0.987903	-1	0.999976	-1	0.938226	-1	0.984514	-1	0.999759	-1	0.999972	1	0.992581	-1	0.998751	1	0.956495	1	0.999999	1	0.997321	1	0.999703	-1	0.974521	-1
Annexin A2 OS=Homo sapiens GN=ANXA2 PE=1 SV=2	ANXA2_HUMAN	39 kDa	0.0389927	0.986297	-1	0.639165	-1	0.999986	1	0.941906	1	0.67166	1	0.949592	-1	0.964545	1	0.618367	1	0.270682	1	0.53584	1	0.145972	1	0.0349667	1	0.973979	1	0.767228	1	0.992648	1
Keratin-81-like protein OS=Homo sapiens PE=2 SV=3	KT81L_HUMAN	53 kDa	0.151324	1	1	0.893768	-1	0.999998	1	0.906556	1	0.691806	-1	0.893802	-1	0.999998	1	0.906535	1	0.691829	-1	0.848055	1	0.304953	1	0.998679	-1	0.940109	1	0.623465	-1	0.146033	-1
Keratin, type II cytoskeletal 2 epidermal OS=Homo sapiens GN=KRT2 PE=1 SV=2	K22E_HUMAN	65 kDa	1.11239e-05	1	-1	0.996894	-1	0.99791	1	0.0378212	1	0.270696	-1	0.996894	-1	0.997911	1	0.0379117	1	0.270819	-1	0.94326	1	0.0121516	1	0.506903	-1	0.101785	1	0.132287	-1	0.000415693	-1
Plakophilin-3 OS=Homo sapiens GN=PKP3 PE=1 SV=1	PKP3_HUMAN	87 kDa	5.86515e-06	1	-1	0.973772	-1	0.683165	1	0.758366	1	0.00918371	-1	0.973771	-1	0.683204	1	0.758366	1	0.00914701	-1	0.236591	1	0.296076	1	0.063738	-1	0.999996	-1	9.20022e-05	-1	0.000134779	-1
ATP synthase subunit beta, mitochondrial OS=Homo sapiens GN=ATP5B PE=1 SV=3	ATPB_HUMAN	57 kDa	2.02785e-05	0.211887	-1	0.0372704	-1	0.605263	-1	0.932366	-1	0.000107502	-1	0.97499	-1	0.982704	1	0.766642	1	0.0899543	-1	0.703738	1	0.30776	1	0.376143	-1	0.987466	1	0.0154206	-1	0.00229478	-1
Galectin-3 OS=Homo sapiens GN=LGALS3 PE=1 SV=5	LEG3_HUMAN (+2)	26 kDa	0.00117884	1	-1	0.970949	-1	0.979847	1	0.739421	1	0.0707549	-1	0.970947	-1	0.979851	1	0.7394	1	0.0706457	-1	0.6719	1	0.269771	1	0.336124	-1	0.985361	1	0.0106598	-1	0.0013352	-1
Actin, cytoplasmic 2 OS=Homo sapiens GN=ACTG1 PE=1 SV=1	ACTG_HUMAN (+1)	42 kDa	2.52401e-05	0.969649	-1	0.440046	-1	0.999966	1	0.882125	1	0.0289657	1	0.896534	-1	0.925337	1	0.416138	1	0.00223897	1	0.327777	1	0.0427345	1	3.86259e-05	1	0.944154	1	0.0496034	1	0.361832	1
Heat shock-related 70 kDa protein 2 OS=Homo sapiens GN=HSPA2 PE=1 SV=1	HSP72_HUMAN	70 kDa	0.00374998	1	-1	0.989218	-1	0.992649	1	0.313355	1	0.412547	-1	0.989218	-1	0.992649	1	0.313586	1	0.412585	-1	0.840687	1	0.0918796	1	0.788746	-1	0.663246	1	0.155096	-1	0.00330154	-1
Histone 1, H1c OS=Homo sapiens GN=HIST1H1C PE=2 SV=1	A8K4I2_HUMAN (+1)	21 kDa	0.000139002	1	1	0.899669	-1	0.927705	1	0.425463	1	0.079864	-1	0.89965	-1	0.927702	1	0.425523	1	0.0799891	-1	0.337001	1	0.0458987	1	0.557101	-1	0.945976	1	0.00467683	-1	0.000144904	-1
Thioredoxin reductase 1, cytoplasmic OS=Homo sapiens GN=TXNRD1 PE=2 SV=1	B7Z2S5_HUMAN (+3)	60 kDa	6.97132e-06	1	1	0.965557	-1	0.976011	1	0.705812	1	0.00419403	-1	0.965551	-1	0.976013	1	0.70579	1	0.00416624	-1	0.633359	1	0.229373	1	0.0383812	-1	0.982514	1	0.000378949	-1	4.72717e-05	-1
