# Supplementary material for: Human hair shaft proteomic profiling: individual differences, site specificity and cuticle analysis
Source: PeerJ. 2014 Aug 5;2:e506. doi: 10.7717/peerj.506 (PMC4137660; doi:10.7717/peerj.506)
Supplement: Table S5 [file peerj-02-506-s005.xlsx]

## Sheet: Sheet1
Supplemental Table S5. Pairwise comparisons of Korean samples
Identified Proteins	Accession	MW	Global P-Value Subject Effect	P-Value K2 - K1	Dir. Reg. K2 - K1	P-Value K3 - K1	Dir. Reg. K3 - K1	P-Value K4 - K1	Dir. Reg. K4 - K1	P-Value K5 - K1	Dir. Reg. K5 - K1	P-Value K3 - K2	Dir. Reg. K3 - K2	P-Value K4 - K2	Dir. Reg. K4 - K2	P-Value K5 - K2	Dir. Reg. K5 - K2	P-Value K4 - K3	Dir. Reg. K4 - K3	P-Value K5 - K3	Dir. Reg. K5 - K3	P-Value K5 - K4	Dir. Reg. K5 - K4
Keratin, type II cuticular Hb6 OS=Homo sapiens GN=KRT86 PE=1 SV=1	KRT86_HUMAN	53 kDa	4.0493e-155	0.531521	1	0.961053	1	0	1	0	1	0.907664	-1	0	1	0	1	0	1	0	1	0	1
Keratin, type I cuticular Ha3-II OS=Homo sapiens GN=KRT33B PE=2 SV=3	KT33B_HUMAN	46 kDa	3.31257e-51	0.2184	1	0.152547	1	1.11022e-16	1	0	1	0.999795	1	5.52687e-11	1	0	1	1.0764e-08	1	0	1	0.000705862	1
Keratin, type II cuticular Hb5 OS=Homo sapiens GN=KRT85 PE=1 SV=1	KRT85_HUMAN	56 kDa	7.417e-14	0.998837	-1	0.622538	-1	0.00178844	1	9.13283e-07	1	0.786098	-1	0.00058736	1	3.64562e-07	1	3.59293e-06	1	1.73078e-10	1	0.505917	1
Keratin, type I cuticular Ha1 OS=Homo sapiens GN=KRT31 PE=2 SV=3	K1H1_HUMAN	47 kDa	4.54091e-38	0.972706	1	0.955461	1	1.22125e-15	1	1.11022e-16	1	0.999985	1	7.33857e-14	1	9.76996e-15	1	1.01252e-13	1	1.13243e-14	1	0.998515	1
Keratin, type I cuticular Ha4 OS=Homo sapiens GN=KRT34 PE=3 SV=1	C4AMA3_HUMAN	45 kDa	3.21897e-66	0.400808	1	0.0886402	1	5.55112e-16	1	0	1	0.941072	1	9.40696e-11	1	0	1	1.04655e-08	1	0	1	2.2398e-09	1
Keratin-associated protein 9-9 OS=Homo sapiens GN=KRTAP9-9 PE=4 SV=1	C9JDV2_HUMAN	18 kDa	0.248755	0.998824	-1	0.997489	-1	0.997651	1	0.485196	1	0.999997	-1	0.976231	1	0.331664	1	0.966673	1	0.302678	1	0.685969	1
Keratin, type II cuticular Hb3 OS=Homo sapiens GN=KRT83 PE=1 SV=2	KRT83_HUMAN	54 kDa	7.00869e-110	0.992457	1	0.000258502	1	3.67151e-08	1	0	1	0.00150485	1	8.24648e-07	1	0	1	0.401551	1	0	1	0	1
Keratin, type II cuticular Hb1 OS=Homo sapiens GN=KRT81 PE=1 SV=3	KRT81_HUMAN	55 kDa	2.25074e-86	0.765196	1	0.607696	-1	0.996206	-1	0	1	0.0716999	-1	0.537046	-1	0	1	0.82324	1	0	1	0	1
Keratin, type II cuticular Hb2 OS=Homo sapiens GN=KRT82 PE=1 SV=3	KRT82_HUMAN	57 kDa	2.59088e-34	0.399317	-1	0.44561	-1	4.81915e-12	1	2.59861e-10	1	0.999993	1	0	1	1.11022e-15	1	0	1	1.77636e-15	1	0.98001	-1
Keratin, type I cuticular Ha3-I OS=Homo sapiens GN=KRT33A PE=2 SV=2	KT33A_HUMAN	46 kDa	0.00145193	1	1	0.972624	1	0.0569671	1	0.0222085	1	0.972613	1	0.0569865	1	0.0223552	1	0.232039	1	0.114398	1	0.997324	1
Keratin-associated protein 9-3 OS=Homo sapiens GN=KRTAP9-3 PE=1 SV=1	KRA93_HUMAN	17 kDa	0.364747	0.605922	1	0.944507	1	0.999918	-1	0.673729	1	0.956628	-1	0.520324	-1	0.999967	-1	0.902079	-1	0.976519	1	0.588676	1
Keratin, type I cuticular Ha8 OS=Homo sapiens GN=KRT38 PE=2 SV=3	KRT38_HUMAN	50 kDa	0.00132975	0.359318	1	0.963464	1	0.0135776	1	0.0300777	1	0.746106	-1	0.511758	1	0.71377	1	0.0594314	1	0.11997	1	0.997546	-1
Keratin, type I cuticular Ha5 OS=Homo sapiens GN=KRT35 PE=2 SV=5	KRT35_HUMAN	50 kDa	1.19987e-36	0.20387	-1	0.548477	1	0.0169112	1	0	1	0.00256482	1	3.16083e-06	1	0	1	0.503736	1	1.22125e-15	1	1.30005e-10	1
Desmoplakin OS=Homo sapiens GN=DSP PE=1 SV=3	DESP_HUMAN	332 kDa	7.10184e-06	0.923454	-1	0.905526	-1	0.0147469	1	0.107364	1	0.999998	-1	0.000868	1	0.0112147	1	0.000747512	1	0.00962502	1	0.948724	-1
Keratin-associated protein 3-1 OS=Homo sapiens GN=KRTAP3-1 PE=1 SV=1	KRA31_HUMAN	11 kDa	1.6728e-06	0.99997	1	0.765853	-1	0.919233	1	0.000592815	1	0.702775	-1	0.949655	1	0.000862654	1	0.264729	1	3.75122e-06	1	0.0122339	1
Keratin-associated protein 2-4 OS=Homo sapiens GN=KRTAP2-4 PE=2 SV=1	KRA24_HUMAN	13 kDa	0.174936	0.593832	1	0.650211	1	0.999705	-1	0.995412	-1	0.999987	-1	0.470755	-1	0.354648	-1	0.526842	-1	0.405696	-1	0.999691	-1
Keratin, type I cytoskeletal 39 OS=Homo sapiens GN=KRT39 PE=1 SV=2	K1C39_HUMAN	56 kDa	4.74085e-29	0.0742216	-1	0.053531	-1	3.9441e-08	1	2.19872e-05	1	0.999946	-1	3.33067e-16	1	3.71592e-13	1	1.11022e-16	1	1.12466e-13	1	0.888119	-1
Keratin, type I cuticular Ha2 OS=Homo sapiens GN=KRT32 PE=1 SV=3	K1H2_HUMAN	50 kDa	6.75076e-13	0.999828	1	0.875991	-1	6.47651e-08	1	0.104788	1	0.796854	-1	2.46196e-07	1	0.151967	1	4.21852e-10	1	0.00704302	1	0.00543683	-1
Histone H2A type 1-C OS=Homo sapiens GN=HIST1H2AC PE=1 SV=3	H2A1C_HUMAN	14 kDa	7.07222e-05	0.381134	-1	0.188047	-1	1.69584e-05	-1	0.167051	-1	0.994747	-1	0.017757	-1	0.991174	-1	0.0539792	-1	0.999997	-1	0.0625548	1
Keratin-associated protein 4-3 OS=Homo sapiens GN=KRTAP4-3 PE=2 SV=2	KRA43_HUMAN	21 kDa	0.0183932	0.336588	-1	0.181476	-1	0.606171	-1	0.978186	1	0.997273	-1	0.992506	1	0.10611	1	0.938959	1	0.0454376	1	0.26275	1
V-set and immunoglobulin domain-containing protein 8 OS=Homo sapiens GN=VSIG8 PE=1 SV=1	VSIG8_HUMAN	44 kDa	1.27075e-85	0.998147	1	0.500791	1	0	1	0	1	0.694439	1	0	1	0	1	0	1	0	1	0.00680936	-1
Histone H2B type 1-N OS=Homo sapiens GN=HIST1H2BN PE=1 SV=3	H2B1N_HUMAN	14 kDa	3.42475e-24	0.978313	-1	7.02267e-09	1	1.37453e-10	1	2.39826e-10	1	3.97194e-10	1	6.97409e-12	1	5.62794e-12	1	0.967444	1	0.967443	1	1	-1
Protein S100-A3 OS=Homo sapiens GN=S100A3 PE=1 SV=1	S10A3_HUMAN	12 kDa	0.00614536	0.989131	1	0.999236	1	0.0641908	1	0.0641188	1	0.999289	-1	0.191969	1	0.191842	1	0.115171	1	0.115156	1	1	1
Keratin-associated protein 3-3 OS=Homo sapiens GN=KRTAP3-3 PE=1 SV=1	KRA33_HUMAN	10 kDa	0.00299715	0.944884	1	0.752553	1	0.980059	1	0.00343884	1	0.991484	1	0.999745	-1	0.0375649	1	0.969473	-1	0.118321	1	0.0220956	1
Selenium-binding protein 1 OS=Homo sapiens GN=SELENBP1 PE=1 SV=2	SBP1_HUMAN	52 kDa	1.60599e-09	1	1	0.955977	-1	0.935818	-1	3.02946e-05	1	0.955979	-1	0.935834	-1	1.42842e-05	1	0.999991	-1	4.28559e-07	1	2.15778e-07	1
Junction plakoglobin OS=Homo sapiens GN=JUP PE=1 SV=3	PLAK_HUMAN	82 kDa	0.234444	0.997591	-1	0.994821	1	0.999854	1	0.371831	1	0.951826	1	0.988782	1	0.210326	1	0.999312	-1	0.620537	1	0.468448	1
14-3-3 protein sigma OS=Homo sapiens GN=SFN PE=1 SV=1	1433S_HUMAN	28 kDa	0.00741492	0.934437	-1	0.999981	1	0.805058	1	0.0700771	1	0.903566	1	0.326809	1	0.00693737	1	0.851815	1	0.0889348	1	0.552196	1
Keratin-associated protein 9-2 OS=Homo sapiens GN=KRTAP9-2 PE=1 SV=2	KRA92_HUMAN	18 kDa	0.651873	0.945924	-1	0.612725	-1	0.889149	-1	0.997683	-1	0.957799	-1	0.999775	-1	0.993217	1	0.985637	1	0.800448	1	0.974819	1
Desmoglein-4 OS=Homo sapiens GN=DSG4 PE=1 SV=1	DSG4_HUMAN	114 kDa	0.00317318	0.386376	-1	0.937408	-1	0.498829	1	0.696525	1	0.852117	1	0.0074986	1	0.0199582	1	0.125527	1	0.237526	1	0.998041	-1
Keratin-associated protein 11-1 OS=Homo sapiens GN=KRTAP11-1 PE=1 SV=1	KR111_HUMAN	17 kDa	2.33926e-29	0.981664	-1	0.70523	-1	1.7471e-06	1	3.77587e-13	1	0.949714	-1	8.43137e-08	1	2.93099e-14	1	5.60087e-09	1	2.22045e-16	1	0.0754596	1
Keratin-associated protein 9-8 OS=Homo sapiens GN=KRTAP9-8 PE=2 SV=2	KRA98_HUMAN	17 kDa	0.00149032	0.969122	-1	0.294546	-1	0.00276155	-1	0.0938224	-1	0.680812	-1	0.0205524	-1	0.334666	-1	0.391703	-1	0.980539	-1	0.740797	1
Keratin-associated protein 9-4 OS=Homo sapiens GN=KRTAP9-4 PE=2 SV=2	KRA94_HUMAN	16 kDa	0.517298	0.998567	1	0.999291	1	0.688385	1	0.688386	1	0.999999	-1	0.842882	1	0.842874	1	0.820552	1	0.820557	1	1	-1
Keratin-associated protein 9-7 OS=Homo sapiens GN=KRTAP9-7 PE=3 SV=1	KRA97_HUMAN	18 kDa	0.0002131	0.189972	-1	0.0625143	-1	0.997525	1	0.0221938	-1	0.980341	-1	0.0988622	1	0.836663	-1	0.0293038	1	0.988415	-1	0.00991093	-1
Putative keratin-associated protein 10-like ENSP00000375147 OS=Homo sapiens PE=3 SV=1	KR10D_HUMAN	54 kDa	1.52332e-24	0.946113	-1	0.421527	-1	0.00118871	1	5.89562e-12	1	0.863409	-1	5.60706e-05	1	9.01501e-14	1	3.95209e-07	1	4.44089e-16	1	0.00469814	1
Dual specificity protein phosphatase 14 OS=Homo sapiens GN=DUSP14 PE=1 SV=1	DUS14_HUMAN (+1)	22 kDa	3.39784e-07	0.811572	-1	0.999793	-1	0.000181909	-1	0.00333136	-1	0.890132	1	0.00578282	-1	0.0687149	-1	0.000321946	-1	0.0056661	-1	0.869626	1
Keratin-associated protein 13-2 OS=Homo sapiens GN=KRTAP13-2 PE=1 SV=1	KR132_HUMAN	19 kDa	0.00338855	0.999151	1	0.766669	-1	0.10602	-1	0.747661	1	0.614134	-1	0.0572039	-1	0.873721	1	0.704087	-1	0.124735	1	0.0029733	1
Plakophilin-1 OS=Homo sapiens GN=PKP1 PE=1 SV=2	PKP1_HUMAN	83 kDa	0.0174232	0.905348	1	0.532597	-1	0.186466	-1	0.884212	-1	0.112987	-1	0.0204035	-1	0.371294	-1	0.96716	-1	0.972429	1	0.714681	1
Keratin-associated protein 7-1 OS=Homo sapiens GN=KRTAP7-1 PE=2 SV=2	KRA71_HUMAN	9 kDa	0.00474898	0.698765	1	0.605579	-1	0.45037	-1	0.390642	-1	0.0665709	-1	0.0375287	-1	0.0292537	-1	0.999045	-1	0.996305	-1	0.999971	-1
Keratin, type I cytoskeletal 40 OS=Homo sapiens GN=KRT40 PE=1 SV=2	K1C40_HUMAN	48 kDa	6.30362e-05	0.276113	-1	0.927856	-1	0.852899	1	0.00832987	-1	0.749295	1	0.0309839	1	0.516669	-1	0.376568	1	0.0615675	-1	0.000398418	-1
Histone H4 OS=Homo sapiens GN=HIST1H4L PE=2 SV=1	B2R4R0_HUMAN (+2)	11 kDa	0.103235	0.925802	-1	0.781665	1	0.637701	-1	0.998957	1	0.288187	1	0.979245	-1	0.81812	1	0.0871828	-1	0.902578	-1	0.468772	1
Keratin-associated protein 9-6 OS=Homo sapiens GN=KRTAP9-6 PE=3 SV=1	KRA96_HUMAN	17 kDa	4.12433e-10	0.941961	-1	0.398464	-1	0.000834737	1	0.0204686	1	0.853905	-1	3.14911e-05	1	0.0016114	1	2.7821e-07	1	2.43264e-05	1	0.889294	-1
Keratin-associated protein 13-1 OS=Homo sapiens GN=KRTAP13-1 PE=2 SV=2	KR131_HUMAN	18 kDa	0.35906	0.965252	1	0.861768	-1	0.816652	-1	1	-1	0.476395	-1	0.418147	-1	0.965258	-1	0.999981	-1	0.861769	1	0.816655	1
Keratin-associated protein 19-5 OS=Homo sapiens GN=KRTAP19-5 PE=1 SV=1	KR195_HUMAN	8 kDa	0.00384573	0.999901	1	0.847421	-1	0.0183675	-1	0.598774	-1	0.774735	-1	0.0131587	-1	0.508764	-1	0.152912	-1	0.992079	-1	0.315806	1
Hephaestin-like protein 1 OS=Homo sapiens GN=HEPHL1 PE=2 SV=2	HPHL1_HUMAN	132 kDa	0.00136829	0.996294	-1	0.998821	-1	0.0334984	-1	0.778544	1	0.999984	1	0.0770992	-1	0.55832	1	0.0629901	-1	0.616785	1	0.00133499	1
Protein-glutamine gamma-glutamyltransferase E OS=Homo sapiens GN=TGM3 PE=1 SV=4	TGM3_HUMAN	77 kDa	0.000167686	0.0014935	-1	0.287704	-1	0.00158668	-1	0.762444	-1	0.34132	1	1	-1	0.066174	1	0.341288	-1	0.936152	1	0.0662214	1
Glyceraldehyde-3-phosphate dehydrogenase OS=Homo sapiens GN=GAPDH PE=1 SV=3	G3P_HUMAN	36 kDa	0.418852	0.999123	1	0.981671	1	0.873868	-1	0.873884	-1	0.998195	1	0.749597	-1	0.749614	-1	0.566225	-1	0.566234	-1	1	-1
Keratin, type I cuticular Ha7 OS=Homo sapiens GN=KRT37 PE=2 SV=3	KRT37_HUMAN	50 kDa	2.85257e-09	0.86031	1	0.860473	-1	0.00103547	-1	0.00102604	-1	0.289023	-1	4.92123e-05	-1	3.80678e-05	-1	0.0168	-1	0.0166893	-1	1	-1
Calmodulin-like protein 3 OS=Homo sapiens GN=CALML3 PE=1 SV=2	CALL3_HUMAN	17 kDa	0.491293	0.998387	-1	0.961027	-1	0.999909	1	0.830315	1	0.995239	-1	0.992577	1	0.667105	1	0.924854	1	0.42959	1	0.891661	1
Core histone macro-H2A.1 OS=Homo sapiens GN=H2AFY PE=1 SV=4	H2AY_HUMAN	40 kDa	6.61958e-05	0.942473	1	0.954992	1	0.0815908	-1	0.0815587	-1	0.999998	-1	0.0165415	-1	0.0164619	-1	0.0185658	-1	0.0185617	-1	1	-1
Keratin, type II cytoskeletal 7 OS=Homo sapiens GN=KRT7 PE=4 SV=1	F5GZD1_HUMAN	45 kDa	1.79963e-07	0.991938	-1	0.842607	-1	0.000512387	-1	0.00057054	-1	0.977084	-1	0.00213022	-1	0.00207445	-1	0.011318	-1	0.0112175	-1	1	-1
cDNA FLJ43122 fis, clone CTONG3003737, highly similar to Leucine-rich repeat-containing protein 15 OS=Homo sapiens PE=2 SV=1	B3KWI4_HUMAN (+1)	64 kDa	0.312092	0.99744	-1	0.940827	-1	0.263779	-1	0.913526	-1	0.9925	-1	0.434831	-1	0.984682	-1	0.700532	-1	0.999985	-1	0.752815	1
Histone H2A type 2-A OS=Homo sapiens GN=HIST2H2AA3 PE=1 SV=3	H2A2A_HUMAN (+1)	14 kDa	5.34097e-09	0.524613	-1	0.860694	-1	2.91568e-05	-1	0.00027643	-1	0.977811	1	0.00307759	-1	0.0252284	-1	0.000625079	-1	0.00531884	-1	0.897754	1
Histone H3 OS=Homo sapiens GN=H3F3A PE=2 SV=1	B2R4P9_HUMAN (+2)	15 kDa	0.316238	0.99692	1	0.980624	-1	0.489814	-1	1	-1	0.896149	-1	0.304802	-1	0.99692	-1	0.814259	-1	0.980623	1	0.489944	1
Histone H3.1 OS=Homo sapiens GN=HIST1H3A PE=1 SV=2	H31_HUMAN	15 kDa	7.57144e-10	0.977616	-1	0.176524	1	0.197094	-1	0.000242377	-1	0.0444107	1	0.505833	-1	0.00173273	-1	0.000213616	-1	5.8314e-09	-1	0.155474	-1
Protein FAM26D OS=Homo sapiens GN=FAM26D PE=1 SV=1	FA26D_HUMAN	35 kDa	0.02892	1	1	0.989914	-1	0.0897906	-1	0.360045	-1	0.989914	-1	0.0897943	-1	0.360024	-1	0.23004	-1	0.645969	-1	0.9443	1
Keratin-associated protein 9-1 OS=Homo sapiens GN=KRTAP9-1 PE=3 SV=1	KRA91_HUMAN	26 kDa	0.0027163	0.995964	-1	0.91177	-1	0.0065407	-1	0.506008	-1	0.988292	-1	0.0168222	-1	0.735018	-1	0.0537058	-1	0.945615	-1	0.235059	1
cDNA, FLJ93005, highly similar to Homo sapiens tubulin, beta polypeptide (TUBB), mRNA OS=Homo sapiens PE=2 SV=1	B2R6L0_HUMAN (+1)	50 kDa	2.91472e-07	0.999523	1	0.555346	-1	0.00161127	-1	0.00052589	-1	0.421179	-1	0.000794388	-1	0.000251175	-1	0.11006	-1	0.0491114	-1	0.996461	-1
Fatty acid binding protein 4, adipocyte OS=Homo sapiens GN=FABP4 PE=3 SV=1	E7DVW4_HUMAN (+1)	15 kDa	0.187953	0.998124	-1	0.955275	-1	0.169982	-1	0.934039	-1	0.994474	-1	0.286856	-1	0.988652	-1	0.501866	-1	0.999989	-1	0.552454	1
Peroxiredoxin-6 OS=Homo sapiens GN=PRDX6 PE=1 SV=3	PRDX6_HUMAN	25 kDa	0.13174	0.969447	1	0.997054	-1	0.576725	-1	0.576727	-1	0.867577	-1	0.234646	-1	0.234651	-1	0.779148	-1	0.77916	-1	1	-1
Keratin-associated protein 10-10 OS=Homo sapiens GN=KRTAP10-10 PE=1 SV=1	KR10A_HUMAN	26 kDa	0.196015	0.99939	-1	0.984248	-1	0.223353	-1	0.976216	-1	0.998178	-1	0.309155	-1	0.9962	-1	0.451792	-1	0.999996	-1	0.485	1
Galectin-7 OS=Homo sapiens GN=LGALS7 PE=1 SV=2	LEG7_HUMAN	15 kDa	0.016625	0.987447	-1	0.776683	-1	0.999182	-1	0.0207809	-1	0.964914	-1	0.999103	1	0.0764085	-1	0.892877	1	0.294551	-1	0.0405703	-1
Tubulin alpha-1B chain OS=Homo sapiens GN=TUBA1B PE=1 SV=1	TBA1B_HUMAN	50 kDa	0.274218	0.994548	-1	0.88589	-1	0.289802	-1	0.571856	-1	0.984305	-1	0.517937	-1	0.810203	-1	0.831173	-1	0.979685	-1	0.988455	1
Type II hair keratin 1 (Fragment) OS=Homo sapiens GN=KRTHB1 PE=2 SV=1	Q9NSB5_HUMAN	13 kDa	9.9403e-16	0.00626295	-1	0.0100992	-1	0.149338	-1	1.9309e-12	-1	0.999883	1	0.774446	1	6.55189e-06	-1	0.851111	1	4.0263e-06	-1	4.02508e-08	-1
Keratin, type I cytoskeletal 10 OS=Homo sapiens GN=KRT10 PE=1 SV=6	K1C10_HUMAN	59 kDa	1.93271e-69	1	1	0.590554	-1	0	1	7.74118e-08	-1	0.590599	-1	0	1	7.04788e-08	-1	0	1	4.62794e-05	-1	0	-1
Keratin-associated protein 10-12 OS=Homo sapiens GN=KRTAP10-12 PE=1 SV=1	KR10C_HUMAN	25 kDa	0.00030047	0.999844	-1	0.999991	1	0.00342431	-1	0.96288	-1	0.999236	1	0.005522	-1	0.986597	-1	0.00275671	-1	0.944739	-1	0.0188904	1
Bleomycin hydrolase OS=Homo sapiens GN=BLMH PE=1 SV=1	BLMH_HUMAN	53 kDa	1.69808e-05	0.993806	-1	0.873153	-1	0.00157976	-1	0.00956699	-1	0.982242	-1	0.00503209	-1	0.0288552	-1	0.0218414	-1	0.103862	-1	0.956463	1
Annexin A2 OS=Homo sapiens GN=ANXA2 PE=1 SV=2	ANXA2_HUMAN	39 kDa	6.75752e-09	0.986229	-1	0.967923	-1	0.0005248	-1	2.90295e-05	-1	0.999932	-1	0.00296008	-1	0.000203559	-1	0.0043936	-1	0.000297483	-1	0.91004	-1
Keratin-81-like protein OS=Homo sapiens PE=2 SV=3	KT81L_HUMAN	53 kDa	1.69808e-05	0.993807	-1	0.873165	-1	0.00163476	-1	0.00947967	-1	0.982242	-1	0.00510707	-1	0.0287027	-1	0.0218562	-1	0.103921	-1	0.956468	1
Keratin, type II cytoskeletal 2 epidermal OS=Homo sapiens GN=KRT2 PE=1 SV=2	K22E_HUMAN	65 kDa	6.04721e-76	0.922793	-1	0.315117	-1	0	1	3.54605e-13	-1	0.812	-1	0	1	3.98968e-11	-1	0	1	1.83688e-08	-1	0	-1
Plakophilin-3 OS=Homo sapiens GN=PKP3 PE=1 SV=1	PKP3_HUMAN	87 kDa	0.000194622	0.947517	1	0.892125	-1	0.118211	-1	0.0157571	-1	0.473954	-1	0.0196325	-1	0.00184047	-1	0.540265	-1	0.136387	-1	0.909879	-1
ATP synthase subunit beta, mitochondrial OS=Homo sapiens GN=ATP5B PE=1 SV=3	ATPB_HUMAN	57 kDa	0.00263473	0.999905	1	0.999994	-1	0.194252	-1	0.0538337	-1	0.999514	-1	0.149731	-1	0.0399782	-1	0.220364	-1	0.062426	-1	0.950691	-1
Galectin-3 OS=Homo sapiens GN=LGALS3 PE=1 SV=5	LEG3_HUMAN (+2)	26 kDa	0.220839	0.996347	-1	0.919042	-1	0.181268	-1	0.88311	-1	0.989378	-1	0.338621	-1	0.978478	-1	0.622501	-1	0.999978	-1	0.683634	1
Actin, cytoplasmic 2 OS=Homo sapiens GN=ACTG1 PE=1 SV=1	ACTG_HUMAN (+1)	42 kDa	1.83505e-09	0.982973	-1	0.720354	-1	0.000227007	-1	8.31907e-06	-1	0.953111	-1	0.00133539	-1	5.87892e-05	-1	0.0126907	-1	0.000857249	-1	0.891522	-1
Heat shock-related 70 kDa protein 2 OS=Homo sapiens GN=HSPA2 PE=1 SV=1	HSP72_HUMAN	70 kDa	0.0198787	0.993093	-1	0.861067	-1	0.230849	-1	0.035451	-1	0.980261	-1	0.454402	-1	0.0987905	-1	0.797045	-1	0.295394	-1	0.913206	-1
Histone 1, H1c OS=Homo sapiens GN=HIST1H1C PE=2 SV=1	A8K4I2_HUMAN (+1)	21 kDa	0.00432716	0.996633	-1	0.924662	-1	0.01101	-1	0.420414	-1	0.990194	-1	0.0261093	-1	0.638195	-1	0.0745468	-1	0.886101	-1	0.387477	1
Thioredoxin reductase 1, cytoplasmic OS=Homo sapiens GN=TXNRD1 PE=2 SV=1	B7Z2S5_HUMAN (+3)	60 kDa	1.79963e-07	0.991938	-1	0.842595	-1	0.000547136	-1	0.000529868	-1	0.977079	-1	0.00207251	-1	0.00212656	-1	0.0111348	-1	0.0112236	-1	1	-1
