# Supplementary material for: Human hair shaft proteomic profiling: individual differences, site specificity and cuticle analysis
Source: PeerJ. 2014 Aug 5;2:e506. doi: 10.7717/peerj.506 (PMC4137660; doi:10.7717/peerj.506)
Supplement: Table S6 [file peerj-02-506-s006.xlsx]

## Sheet: Sheet1
Supplemental Table S6. Pairwise comparisons of samples of different ethnic origin
Identified Proteins	Accession	MW	Global P-Value Ethnicity Effect	P-Value Caucasian - African-American	Dir. Reg. Caucasian - African-American	P-Value Kenyan - African-American	Dir. Reg. Kenyan - African-American	P-Value Korean - African-American	Dir. Reg. Korean - African-American	P-Value Kenyan - Caucasian	Dir. Reg. Kenyan - Caucasian	P-Value Korean - Caucasian	Dir. Reg. Korean - Caucasian	P-Value Korean - Kenyan	Dir. Reg. Korean - Kenyan
Keratin, type II cuticular Hb6 OS=Homo sapiens GN=KRT86 PE=1 SV=1	KRT86_HUMAN	53 kDa	0.0697576	0.190532	-1	0.0877574	-1	0.14493	-1	0.967849	-1	0.995779	-1	0.996219	1
Keratin, type I cuticular Ha3-II OS=Homo sapiens GN=KRT33B PE=2 SV=3	KT33B_HUMAN	46 kDa	0.65871	0.980666	-1	0.653174	-1	0.99903	-1	0.842534	-1	0.995214	1	0.738389	1
Keratin, type II cuticular Hb5 OS=Homo sapiens GN=KRT85 PE=1 SV=1	KRT85_HUMAN	56 kDa	0.196389	0.709726	-1	0.155309	-1	0.45077	-1	0.677565	-1	0.964142	-1	0.927283	1
Keratin, type I cuticular Ha1 OS=Homo sapiens GN=KRT31 PE=2 SV=3	K1H1_HUMAN	47 kDa	0.0635492	0.623852	-1	0.203801	-1	0.0551783	-1	0.834391	-1	0.471997	-1	0.939055	-1
Keratin, type I cuticular Ha4 OS=Homo sapiens GN=KRT34 PE=3 SV=1	C4AMA3_HUMAN	45 kDa	0.562343	0.99268	-1	0.624566	-1	0.999921	1	0.760216	-1	0.986612	1	0.586163	1
Keratin-associated protein 9-9 OS=Homo sapiens GN=KRTAP9-9 PE=4 SV=1	C9JDV2_HUMAN	18 kDa	0.0266519	0.800478	-1	0.39521	-1	0.017829	-1	0.88277	-1	0.134519	-1	0.51703	-1
Keratin, type II cuticular Hb3 OS=Homo sapiens GN=KRT83 PE=1 SV=2	KRT83_HUMAN	54 kDa	0.685487	0.870899	-1	0.632098	-1	0.961919	-1	0.963337	-1	0.99422	1	0.89532	1
Keratin, type II cuticular Hb1 OS=Homo sapiens GN=KRT81 PE=1 SV=3	KRT81_HUMAN	55 kDa	0.511599	0.692695	-1	0.469277	-1	0.743714	-1	0.97544	-1	0.999976	1	0.971707	1
Keratin, type II cuticular Hb2 OS=Homo sapiens GN=KRT82 PE=1 SV=3	KRT82_HUMAN	57 kDa	0.161127	0.960088	-1	0.147328	-1	0.633785	-1	0.315086	-1	0.877978	-1	0.788149	1
Keratin, type I cuticular Ha3-I OS=Homo sapiens GN=KRT33A PE=2 SV=2	KT33A_HUMAN	46 kDa	0.939599	0.999304	1	0.966636	-1	0.999264	-1	0.92866	-1	0.993984	-1	0.986679	1
Keratin-associated protein 9-3 OS=Homo sapiens GN=KRTAP9-3 PE=1 SV=1	KRA93_HUMAN	17 kDa	0.972458	0.998976	-1	0.990585	-1	0.998589	1	0.998199	-1	0.989888	1	0.967874	1
Keratin, type I cuticular Ha8 OS=Homo sapiens GN=KRT38 PE=2 SV=3	KRT38_HUMAN	50 kDa	0.111711	0.527087	-1	0.954683	1	0.43789	-1	0.23037	1	0.996608	-1	0.183069	-1
Keratin, type I cuticular Ha5 OS=Homo sapiens GN=KRT35 PE=2 SV=5	KRT35_HUMAN	50 kDa	0.0362768	0.0426167	-1	0.138115	-1	0.0966699	-1	0.980668	1	0.996212	1	0.998623	-1
Desmoplakin OS=Homo sapiens GN=DSP PE=1 SV=3	DESP_HUMAN	332 kDa	0.630235	0.996611	1	0.777807	-1	0.952363	-1	0.624552	-1	0.870777	-1	0.974611	1
Keratin-associated protein 3-1 OS=Homo sapiens GN=KRTAP3-1 PE=1 SV=1	KRA31_HUMAN	11 kDa	0.969	0.999994	-1	0.982568	-1	0.985705	-1	0.983845	-1	0.98695	-1	0.999995	1
Keratin-associated protein 2-4 OS=Homo sapiens GN=KRTAP2-4 PE=2 SV=1	KRA24_HUMAN	13 kDa	8.35332e-08	0.219149	-1	1.57317e-05	-1	3.85819e-06	-1	0.00748287	-1	0.00756031	-1	1	1
Keratin, type I cytoskeletal 39 OS=Homo sapiens GN=KRT39 PE=1 SV=2	K1C39_HUMAN	56 kDa	0.905937	0.999924	1	0.960484	-1	0.965126	-1	0.939414	-1	0.945703	-1	0.999997	1
Keratin, type I cuticular Ha2 OS=Homo sapiens GN=KRT32 PE=1 SV=3	K1H2_HUMAN	50 kDa	0.208455	0.999327	-1	0.552754	-1	0.320364	-1	0.594794	-1	0.346534	-1	0.979796	-1
Histone H2A type 1-C OS=Homo sapiens GN=HIST1H2AC PE=1 SV=3	H2A1C_HUMAN	14 kDa	0.0147422	0.156315	-1	0.0359199	-1	0.992475	-1	0.884378	-1	0.27354	1	0.0740834	1
Keratin-associated protein 4-3 OS=Homo sapiens GN=KRTAP4-3 PE=2 SV=2	KRA43_HUMAN	21 kDa	6.34118e-09	1.38894e-05	-1	0.00108701	-1	4.57137e-08	-1	0.865853	1	0.341125	-1	0.0897264	-1
V-set and immunoglobulin domain-containing protein 8 OS=Homo sapiens GN=VSIG8 PE=1 SV=1	VSIG8_HUMAN	44 kDa	0.948808	0.996543	1	0.988286	-1	0.996809	-1	0.946085	-1	0.973195	-1	0.999459	1
Histone H2B type 1-N OS=Homo sapiens GN=HIST1H2BN PE=1 SV=3	H2B1N_HUMAN	14 kDa	0.0164007	0.994016	-1	0.0600173	-1	0.134022	-1	0.086826	-1	0.18821	-1	0.986853	1
Protein S100-A3 OS=Homo sapiens GN=S100A3 PE=1 SV=1	S10A3_HUMAN	12 kDa	0.349317	0.987856	1	0.533307	-1	0.965761	-1	0.307509	-1	0.84619	-1	0.816568	1
Keratin-associated protein 3-3 OS=Homo sapiens GN=KRTAP3-3 PE=1 SV=1	KRA33_HUMAN	10 kDa	0.843318	0.894731	1	0.997361	1	0.999447	-1	0.958544	-1	0.841796	-1	0.989576	-1
Selenium-binding protein 1 OS=Homo sapiens GN=SELENBP1 PE=1 SV=2	SBP1_HUMAN	52 kDa	0.00020587	0.973555	-1	0.044866	-1	0.263735	1	0.0991784	-1	0.090685	1	4.90134e-05	1
Junction plakoglobin OS=Homo sapiens GN=JUP PE=1 SV=3	PLAK_HUMAN	82 kDa	0.0820932	0.0874684	-1	0.191646	-1	0.744148	-1	0.99359	1	0.568139	1	0.759202	1
14-3-3 protein sigma OS=Homo sapiens GN=SFN PE=1 SV=1	1433S_HUMAN	28 kDa	0.74624	0.863431	-1	0.83078	-1	0.737013	-1	0.999559	-1	0.991773	-1	0.99819	-1
Keratin-associated protein 9-2 OS=Homo sapiens GN=KRTAP9-2 PE=1 SV=2	KRA92_HUMAN	18 kDa	0.0455387	0.967904	-1	0.887564	1	0.174837	-1	0.616546	1	0.342028	-1	0.0303282	-1
Desmoglein-4 OS=Homo sapiens GN=DSG4 PE=1 SV=1	DSG4_HUMAN	114 kDa	0.516267	0.93557	1	0.678159	1	0.508477	1	0.938162	1	0.825835	1	0.993341	1
Keratin-associated protein 11-1 OS=Homo sapiens GN=KRTAP11-1 PE=1 SV=1	KR111_HUMAN	17 kDa	0.120496	0.310523	-1	0.233299	-1	0.126167	-1	0.994419	-1	0.942525	-1	0.990712	-1
Keratin-associated protein 9-8 OS=Homo sapiens GN=KRTAP9-8 PE=2 SV=2	KRA98_HUMAN	17 kDa	0.00750647	0.063829	1	0.0448934	1	0.00544812	1	0.994627	1	0.773555	1	0.905382	1
Keratin-associated protein 9-4 OS=Homo sapiens GN=KRTAP9-4 PE=2 SV=2	KRA94_HUMAN	16 kDa	0.676601	0.668312	1	0.996743	1	0.982977	1	0.796181	-1	0.876089	-1	0.998587	1
Keratin-associated protein 9-7 OS=Homo sapiens GN=KRTAP9-7 PE=3 SV=1	KRA97_HUMAN	18 kDa	0.123395	0.996334	1	0.14594	1	0.959897	1	0.190757	1	0.990766	1	0.364575	-1
Putative keratin-associated protein 10-like ENSP00000375147 OS=Homo sapiens PE=3 SV=1	KR10D_HUMAN	54 kDa	0.399691	0.973396	1	0.804849	-1	0.777845	-1	0.521048	-1	0.488062	-1	0.999957	-1
Dual specificity protein phosphatase 14 OS=Homo sapiens GN=DUSP14 PE=1 SV=1	DUS14_HUMAN (+1)	22 kDa	0.282482	0.326963	-1	0.36169	-1	0.494287	-1	1	-1	0.9963	1	0.996253	1
Keratin-associated protein 13-2 OS=Homo sapiens GN=KRTAP13-2 PE=1 SV=1	KR132_HUMAN	19 kDa	9.01775e-10	2.95961e-07	-1	0.93963	1	0.160326	-1	4.32774e-09	1	0.00487446	1	0.0395986	-1
Plakophilin-1 OS=Homo sapiens GN=PKP1 PE=1 SV=2	PKP1_HUMAN	83 kDa	0.320316	0.626839	1	0.392797	1	0.99764	1	0.970612	1	0.747037	-1	0.507206	-1
Keratin-associated protein 7-1 OS=Homo sapiens GN=KRTAP7-1 PE=2 SV=2	KRA71_HUMAN	9 kDa	0.666608	0.935027	-1	0.994356	-1	0.932531	1	0.988088	1	0.615608	1	0.830217	1
Keratin, type I cytoskeletal 40 OS=Homo sapiens GN=KRT40 PE=1 SV=2	K1C40_HUMAN	48 kDa	0.00299602	0.00174772	1	0.115502	1	0.0171661	1	0.546302	-1	0.945138	-1	0.880551	1
Histone H4 OS=Homo sapiens GN=HIST1H4L PE=2 SV=1	B2R4R0_HUMAN (+2)	11 kDa	0.0387249	0.0645188	1	0.978722	1	0.234379	1	0.167139	-1	0.956784	-1	0.444575	1
Keratin-associated protein 9-6 OS=Homo sapiens GN=KRTAP9-6 PE=3 SV=1	KRA96_HUMAN	17 kDa	0.0608568	0.0916081	-1	0.730964	-1	0.109479	-1	0.593901	1	0.999992	-1	0.612046	-1
Keratin-associated protein 13-1 OS=Homo sapiens GN=KRTAP13-1 PE=2 SV=2	KR131_HUMAN	18 kDa	1.10943e-07	0.00579925	-1	0.0489228	1	0.99398	-1	1.41029e-08	1	0.0139621	1	0.0237995	-1
Keratin-associated protein 19-5 OS=Homo sapiens GN=KRTAP19-5 PE=1 SV=1	KR195_HUMAN	8 kDa	0.060136	0.854077	-1	0.445968	1	0.822522	-1	0.0860884	1	0.999582	-1	0.0883382	-1
Hephaestin-like protein 1 OS=Homo sapiens GN=HEPHL1 PE=2 SV=2	HPHL1_HUMAN	132 kDa	0.0702706	0.0832891	-1	0.632766	-1	0.13913	-1	0.674625	1	0.999391	1	0.772197	-1
Protein-glutamine gamma-glutamyltransferase E OS=Homo sapiens GN=TGM3 PE=1 SV=4	TGM3_HUMAN	77 kDa	4.53873e-05	6.87824e-05	1	0.471158	1	0.00440532	1	0.0201468	-1	0.820808	-1	0.207452	1
Glyceraldehyde-3-phosphate dehydrogenase OS=Homo sapiens GN=GAPDH PE=1 SV=3	G3P_HUMAN	36 kDa	0.00238523	0.00322304	1	0.166129	1	0.00518624	1	0.548512	-1	1	-1	0.58235	1
Keratin, type I cuticular Ha7 OS=Homo sapiens GN=KRT37 PE=2 SV=3	KRT37_HUMAN	50 kDa	0.116297	0.97792	1	0.118799	1	0.935805	1	0.219431	1	0.996636	1	0.361271	-1
Calmodulin-like protein 3 OS=Homo sapiens GN=CALML3 PE=1 SV=2	CALL3_HUMAN	17 kDa	0.234037	0.199312	1	0.730191	1	0.398614	1	0.804945	-1	0.986111	-1	0.950746	1
Core histone macro-H2A.1 OS=Homo sapiens GN=H2AFY PE=1 SV=4	H2AY_HUMAN	40 kDa	0.600055	0.66572	1	0.599092	1	0.895905	1	0.998597	1	0.977586	-1	0.949459	-1
Keratin, type II cytoskeletal 7 OS=Homo sapiens GN=KRT7 PE=4 SV=1	F5GZD1_HUMAN	45 kDa	0.793368	0.99996	-1	0.998933	1	0.860989	-1	0.997213	1	0.866977	-1	0.788404	-1
cDNA FLJ43122 fis, clone CTONG3003737, highly similar to Leucine-rich repeat-containing protein 15 OS=Homo sapiens PE=2 SV=1	B3KWI4_HUMAN (+1)	64 kDa	0.0318532	0.0556085	-1	0.606241	-1	0.0642656	-1	0.599503	1	0.999871	-1	0.592756	-1
Histone H2A type 2-A OS=Homo sapiens GN=HIST2H2AA3 PE=1 SV=3	H2A2A_HUMAN (+1)	14 kDa	0.307119	0.283064	-1	0.682353	-1	0.456522	-1	0.926251	1	0.995175	1	0.983896	-1
Histone H3 OS=Homo sapiens GN=H3F3A PE=2 SV=1	B2R4P9_HUMAN (+2)	15 kDa	0.692473	1	1	0.935922	1	0.759733	1	0.92786	1	0.733591	1	0.979092	1
Histone H3.1 OS=Homo sapiens GN=HIST1H3A PE=1 SV=2	H31_HUMAN	15 kDa	0.0552058	0.0943651	1	0.0675346	1	0.120845	1	0.995335	1	0.999995	-1	0.994585	-1
Protein FAM26D OS=Homo sapiens GN=FAM26D PE=1 SV=1	FA26D_HUMAN	35 kDa	0.769671	0.883996	1	0.857434	1	0.999995	1	0.999691	1	0.893814	-1	0.867913	-1
Keratin-associated protein 9-1 OS=Homo sapiens GN=KRTAP9-1 PE=3 SV=1	KRA91_HUMAN	26 kDa	0.419606	0.670707	-1	0.999922	1	0.63781	-1	0.631002	1	0.999554	-1	0.599527	-1
cDNA, FLJ93005, highly similar to Homo sapiens tubulin, beta polypeptide (TUBB), mRNA OS=Homo sapiens PE=2 SV=1	B2R6L0_HUMAN (+1)	50 kDa	0.0949746	0.213331	-1	0.979711	-1	0.193727	-1	0.421274	1	0.998913	-1	0.380757	-1
Fatty acid binding protein 4, adipocyte OS=Homo sapiens GN=FABP4 PE=3 SV=1	E7DVW4_HUMAN (+1)	15 kDa	0.288982	0.912087	-1	0.70697	1	0.889069	1	0.282121	1	0.490515	1	0.985046	-1
Peroxiredoxin-6 OS=Homo sapiens GN=PRDX6 PE=1 SV=3	PRDX6_HUMAN	25 kDa	0.219095	0.268191	1	0.289431	1	0.317637	1	0.999992	1	0.99999	-1	0.999937	-1
Keratin-associated protein 10-10 OS=Homo sapiens GN=KRTAP10-10 PE=1 SV=1	KR10A_HUMAN	26 kDa	0.447268	0.908695	1	0.433781	1	0.992199	1	0.798801	1	0.981786	-1	0.608874	-1
Galectin-7 OS=Homo sapiens GN=LGALS7 PE=1 SV=2	LEG7_HUMAN	15 kDa	0.515061	0.432789	1	0.888551	1	0.836832	1	0.873912	-1	0.920317	-1	0.99945	1
Tubulin alpha-1B chain OS=Homo sapiens GN=TUBA1B PE=1 SV=1	TBA1B_HUMAN	50 kDa	0.469974	0.444425	-1	0.90735	-1	0.647096	-1	0.861842	1	0.993513	1	0.959983	-1
Type II hair keratin 1 (Fragment) OS=Homo sapiens GN=KRTHB1 PE=2 SV=1	Q9NSB5_HUMAN	13 kDa	0.194293	0.20716	1	0.357127	1	0.287049	1	0.994783	-1	0.999616	-1	0.999083	1
Keratin, type I cytoskeletal 10 OS=Homo sapiens GN=KRT10 PE=1 SV=6	K1C10_HUMAN	59 kDa	0.622319	0.966866	-1	0.971978	1	0.877215	1	0.793239	1	0.597895	1	0.989383	1
Keratin-associated protein 10-12 OS=Homo sapiens GN=KRTAP10-12 PE=1 SV=1	KR10C_HUMAN	25 kDa	0.032352	0.0308969	1	0.576406	1	0.0952204	1	0.479386	-1	0.985518	-1	0.725475	1
Bleomycin hydrolase OS=Homo sapiens GN=BLMH PE=1 SV=1	BLMH_HUMAN	53 kDa	0.631315	0.999995	1	0.997058	-1	0.682728	-1	0.995391	-1	0.638297	-1	0.800094	-1
Annexin A2 OS=Homo sapiens GN=ANXA2 PE=1 SV=2	ANXA2_HUMAN	39 kDa	0.830924	0.995943	-1	0.977456	-1	0.807944	-1	0.997245	-1	0.893785	-1	0.961542	-1
Keratin-81-like protein OS=Homo sapiens PE=2 SV=3	KT81L_HUMAN	53 kDa	0.70769	0.962487	1	0.720536	1	0.999809	1	0.928236	1	0.978292	-1	0.767578	-1
Keratin, type II cytoskeletal 2 epidermal OS=Homo sapiens GN=KRT2 PE=1 SV=2	K22E_HUMAN	65 kDa	0.582175	0.990133	1	0.824342	1	0.589218	1	0.93377	1	0.7439	1	0.978602	1
Plakophilin-3 OS=Homo sapiens GN=PKP3 PE=1 SV=1	PKP3_HUMAN	87 kDa	0.212223	0.89609	1	0.205754	1	0.460242	1	0.533934	1	0.841239	1	0.960377	-1
ATP synthase subunit beta, mitochondrial OS=Homo sapiens GN=ATP5B PE=1 SV=3	ATPB_HUMAN	57 kDa	0.378656	0.905979	1	0.30883	1	0.860379	1	0.669621	1	0.99891	1	0.781745	-1
Galectin-3 OS=Homo sapiens GN=LGALS3 PE=1 SV=5	LEG3_HUMAN (+2)	26 kDa	0.382206	0.797213	-1	0.91174	1	0.971019	1	0.376026	1	0.513842	1	0.996326	-1
Actin, cytoplasmic 2 OS=Homo sapiens GN=ACTG1 PE=1 SV=1	ACTG_HUMAN (+1)	42 kDa	0.769151	0.909755	1	0.998267	1	0.984266	-1	0.961498	-1	0.726853	-1	0.952469	-1
Heat shock-related 70 kDa protein 2 OS=Homo sapiens GN=HSPA2 PE=1 SV=1	HSP72_HUMAN	70 kDa	0.559254	0.978518	1	0.545546	1	0.804472	1	0.755411	1	0.9486	1	0.973762	-1
Histone 1, H1c OS=Homo sapiens GN=HIST1H1C PE=2 SV=1	A8K4I2_HUMAN (+1)	21 kDa	0.653639	1	-1	0.703689	1	0.980389	1	0.669085	1	0.976648	1	0.900864	-1
Thioredoxin reductase 1, cytoplasmic OS=Homo sapiens GN=TXNRD1 PE=2 SV=1	B7Z2S5_HUMAN (+3)	60 kDa	0.674573	0.713769	-1	0.978868	-1	0.750467	-1	0.916912	1	0.999999	1	0.931204	-1
